# Supplementary material for: Copper-catalyzed asymmetric allylic alkylation of racemic inert cyclic allylic ethers under batch and flow conditions
Source: Royal Society of Chemistry journal article supplement (doi:10.1039/d3sc00127j), 2023-01-01

Supporting Information for

## Copper-catalyzed asymmetric allylic alkylation of racemic inert cyclic allylic ethers under batch and flow conditions

*Jun Li*<sup>a</sup>, *Xiao Song*<sup>a</sup>, *Yan Wang*<sup>a</sup>, *Junrong Huang*<sup>\*a,b</sup>, *Hengzhi You*<sup>\*a,b</sup>, *Fen-Er Chen*<sup>\*a,b,c</sup>

<sup>a</sup> School of science, Harbin Institute of Technology (Shenzhen), Taoyuan Street, Nanshan District, Shenzhen, 518055, China.

<sup>b</sup> Green Pharmaceutical Engineering Research Center, Harbin Institute of Technology (Shenzhen), Taoyuan Street, Nanshan, District, Shenzhen, 518055, China.

<sup>c</sup> Engineering Center of Catalysis and Synthesis for Chiral Molecules, Department of Chemistry, Fudan University, Shanghai, 200433, China.

\* Corresponding authors

E-mail: [hjunrong@hit.edu.cn](mailto:hjunrong@hit.edu.cn); [youhengzhi@hit.edu.cn](mailto:youhengzhi@hit.edu.cn); [rfchen@fudan.edu.cn](mailto:rfchen@fudan.edu.cn)

## Table of Contents

|                                                   |   |
|---------------------------------------------------|---|
| 1 General information .....                       | 1 |
| 2 Substrate scope.....                            | 1 |
| 3 Experimental parts .....                        | 2 |
| 4 Experiments under flow .....                    | 4 |
| 5 Mechanistic analysis .....                      | 5 |
| 6 Number of equivalents of catalyst loading ..... | 7 |
| 7 References.....                                 | 7 |
| 8 Spectroscopic and Chromatographic datas .....   | 9 |

# 1 General information

All reactions were carried out under argon atmosphere with flame-dried glassware. Solvents were redistilled under nitrogen before use to remove water and oxygen.  $^1\text{H}$  (400 MHz) and  $^{13}\text{C}$  (100 MHz) NMR spectra were recorded on a Quantum-I 400M in  $\text{CDCl}_3$ , and chemical shift ( $\delta$ ) are given in ppm relative to residual  $\text{CHCl}_3$ . Coupling constants ( $J$ ) are reported in Hertz (Hz). The residual solvent peak was used as an internal reference:  $^1\text{H}$  NMR (chloroform  $\delta$  7.26) and  $^{13}\text{C}$  NMR (chloroform  $\delta$  77.0). The following abbreviations were used to explain the multiplicities: s = singlet, d = doublet, t = triplet, q = quartet, m = multiplet. Evolution of reaction was followed by GC-MS (EI mode) on an Agilent 7890B-5977B. Optical rotations were recorded on an IP-digi300/2 polarimeter at 25 °C in a 5 cm cell in the stated solvent. Enantiomeric ratio was determined by chiral GC measurement either on an Agilent 7890B with the stated column or UltiMate 3000 with the stated column using isopropanol and *n*-hexane as mobile phase. Temperature programs are described as follows: initial temperature (°C) - initial time (min) - temperature gradient (°C/min) - final temperature (°C); retention times (RT) are given in min. Column chromatography purifications were performed by flash chromatography on Santai Technologies Inc. SepaBean® machine T using Merck silica gel 60 Å or neutral alumina. All substrates and ligands were prepared according to the published procedures. Other reagents were received from commercial sources. Microreactor was received from E-zheng. The absolute configuration was assigned according to the literature report.<sup>1-6</sup>

## 2 Substrate scope

### 2.1 (*E*)- allylic ether

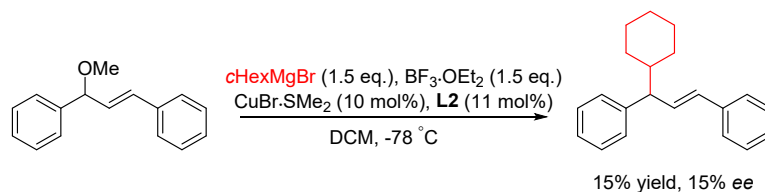

**Scheme S1** AAA reaction of (*E*)- allylic ether

## 2.2 3-methoxy-1-methylcyclohex-1-ene.

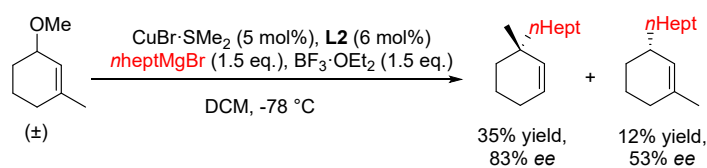

Scheme S2 AAA reaction of *rac*-3-methoxy-1-methylcyclohex-1-ene

## 3 Experimental parts

### A) Procedure used in the synthesis of racemic products:

In a flame-dried Schlenk tube under argon atmosphere, CuTc (0.05 mmol, 10 mol%) and PPh<sub>3</sub> (0.055 mmol, 11 mol%) was dissolved in dry DCM (2 mL) and the solution was stirred for 15 min at room temperature. Then, the cyclic allylic bromide (0.5 mmol) was added and the solution was cooled to -78 °C. After 10 min at this temperature, the corresponding Grignard reagent (0.75 mmol, 1.5 equiv.) was added dropwise to the reaction mixture under nitrogen. Once the addition was complete, the mixture was stirred for another 1 h at -78 °C. The reaction was quenched with an aqueous solution of saturated aqueous NH<sub>4</sub>Cl solution (2 mL) and extracted with DCM (15 mL). Organic layer was washed with the saturated aqueous NH<sub>4</sub>Cl solution (15 mL) and brine (15 mL), dried over Na<sub>2</sub>SO<sub>4</sub>, filtered and concentrated on *vacuo*. Crude mixture was purified on silica gel chromatography column (pentane). Desired product was recovered as a colorless liquid.

### B) General procedure for copper catalyzed asymmetric allylic alkylation

In a flame-dried Schlenk tube under argon atmosphere, CuBr·SMe<sub>2</sub> (0.04 mmol, 10 mol%) and the appropriate ligand (0.044 mmol, 11 mol%) were dissolved in dry DCM (4 mL) and the solution was stirred for 15 min at room temperature. Then, the cyclic allylic ethers (0.4 mmol) and BF<sub>3</sub>·OEt<sub>2</sub> (0.6 mmol, 1.5 equiv.) was added at -78 °C. After 10 min at this temperature, the corresponding Grignard reagent (0.6 mmol, 0.5 or 1 M in Et<sub>2</sub>O, 1.5 equiv.) was added dropwise to the reaction mixture. Once the addition was complete, the mixture was stirred for another 1 h at -78 °C. The reaction was quenched with an aqueous solution of saturated aqueous NH<sub>4</sub>Cl solution (2 mL) and extracted with DCM (15 mL). Organic layer was washed with the saturated aqueous NH<sub>4</sub>Cl solution (15 mL) and brine (15 mL), dried

over  $\text{Na}_2\text{SO}_4$ , filtered and concentrated on *vacuo*. Crude mixture was purified on silica gel chromatography column (pentane). Desired product was recovered as a colorless liquid.

### C) Derivatization of products to epoxides for *ee* determination:

A sample of the isolated product was treated with 2.0 equiv. *m*CPBA and 3.0 equiv.  $\text{Na}_2\text{HPO}_4$  in DCM. After 2 h, DCM (10 mL) was added and the reaction was quenched with an aqueous solution of saturated  $\text{Na}_2\text{SO}_3$ . The organic layer was washed two times with an aqueous solution of 1 M NaOH, dried over  $\text{Na}_2\text{SO}_4$ , filtered and concentrated on *vacuo*. The crude mixture of two diastereoisomeric epoxides was directly analyzed in chiral GC.

### D) General Procedure of Flow AAA reaction

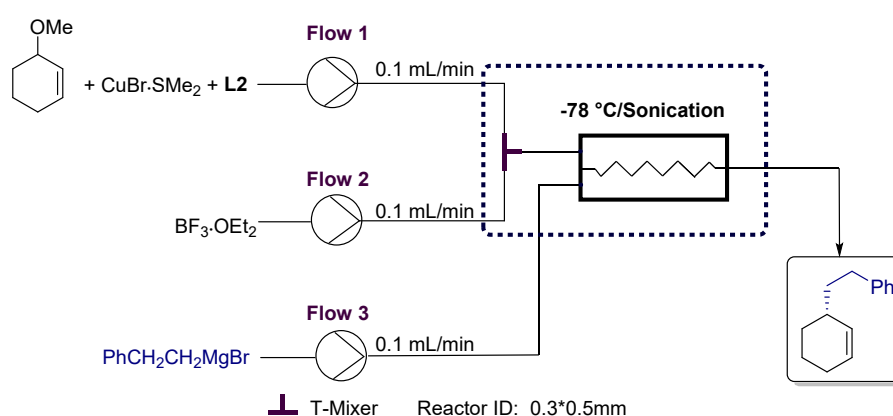

The AAA reaction was conducted in an  $18\text{ }\mu\text{L}$  microreactor made of stainless steel ( $0.3\cdot 0.5\text{mm}$  inner diameter, 120 mm length). The  $\text{CuBr}\cdot\text{SMe}_2$  (0.7 mmol, 10 mol%) and **L2** (0.77 mmol, 11 mol%) were dissolved in 70 mL DCM and the mixture was stirred at room temperature for 30 min. Then, the cyclic allylic methyl ether (7 mmol) was directly added to the mixture. After that, the solution of  $\text{CuBr}\cdot\text{SMe}_2$ , **L2** and cyclic allylic methyl ether was introduced at one inlet at a flow rate of 0.1 mL/min,  $\text{BF}_3\cdot\text{OEt}_2$  (10.5 mmol) in DCM (70 mL) was introduced from other inlet at the 0.1 mL/min flow rate. The two solutions were combined in a T-mixer and injected into the microreactor at  $-78\text{ }^\circ\text{C}$  with sonication. Meanwhile, Grignard reagent (10.5 mmol, 0.15 M, 1.5 equiv.) was injected into the microreactor at the 0.1 mL/min flow rate. The microreactor were cooled to  $-78\text{ }^\circ\text{C}$  with sonication. Total output was 0.3 mL/min (3.6 s of residence time). The reaction mixture was collected, quenched with EtOH or saturated  $\text{NH}_4\text{Cl}$  solution (0.5 mL) and extracted with DCM (15 mL). Organic layer was washed with the saturated  $\text{NH}_4\text{Cl}$  solution (15 mL) and brine (15 mL), dried over  $\text{Na}_2\text{SO}_4$ , filtered and concentrated in

*vacuo*. Crude mixture was purified on silica gel chromatography column (pentane). The desired product was recovered as a colorless liquid.

## 4 Experiments under flow

### 4.1 Selected optimization under continuous flow

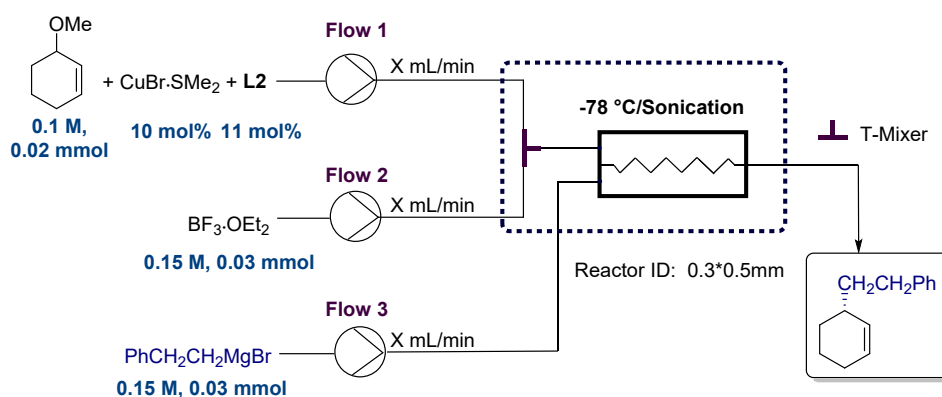

**Table S1.** Selected optimization under continuous flow<sup>a</sup>

| Entry            | X    | ee  | Yield |
|------------------|------|-----|-------|
| 1                | 0.1  | 92% | 95%   |
| 2                | 0.2  | 83% | 86%   |
| 3                | 0.3  | 81% | 85%   |
| 4                | 0.4  | 80% | 68%   |
| 5                | 0.6  | 81% | 65%   |
| 6                | 0.05 | 92% | 95%   |
| 7 <sup>b</sup>   | 0.05 | 87% | 60%   |
| 8 <sup>b,c</sup> | 0.05 | 80% | 92%   |

a: NMR yield. b: 5% catalyst loading. c: 3 eq. Grignard reagent and BF<sub>3</sub>·OEt<sub>2</sub>.

## 4.2 Substrate scope under continuous flow

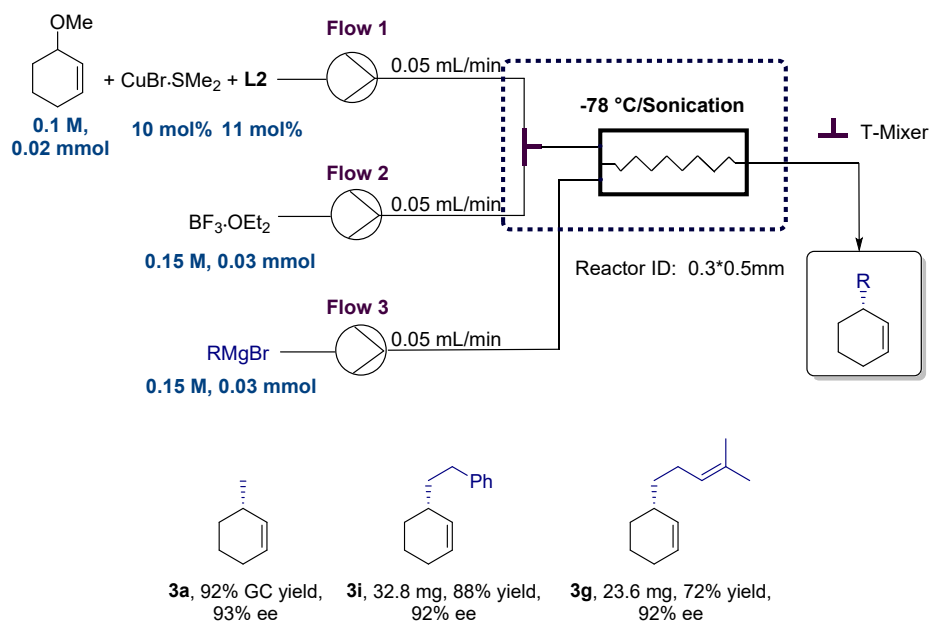

**Scheme S3** Substrate scope under continuous flow

## 5 Mechanistic analysis

### 5.1 GCMS traces of 3c in AAA reaction

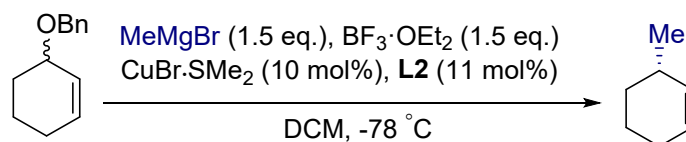

In a flame-dried Schlenk tube under argon atmosphere,  $\text{CuBr} \cdot \text{SMe}_2$  (0.04 mmol, 10 mol%) and the appropriate ligand (0.044 mmol, 11 mol%) were dissolved in dry DCM (4 mL) and the solution was stirred for 15 min at room temperature. Then, 3-benzyloxycyclohexene (0.4 mmol) and  $\text{BF}_3 \cdot \text{OEt}_2$  (0.6 mmol, 1.5 equiv.) was added at -78 °C. After 10 min at this temperature, the  $\text{MeMgBr}$  (0.6 mmol, 0.5 M in  $\text{Et}_2\text{O}$ , 1.5 equiv.) was added dropwise to the reaction mixture. Once the addition was complete, the mixture was stirred for another 1 h at -78 °C and quenched with  $\text{EtOH}$  (0.2 mL).

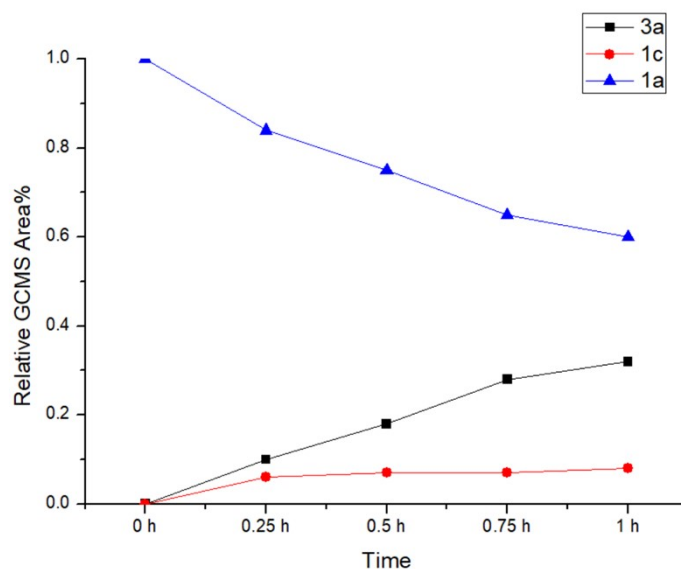

**Fig. S1 GCMS traces of 3c in AAA reaction**

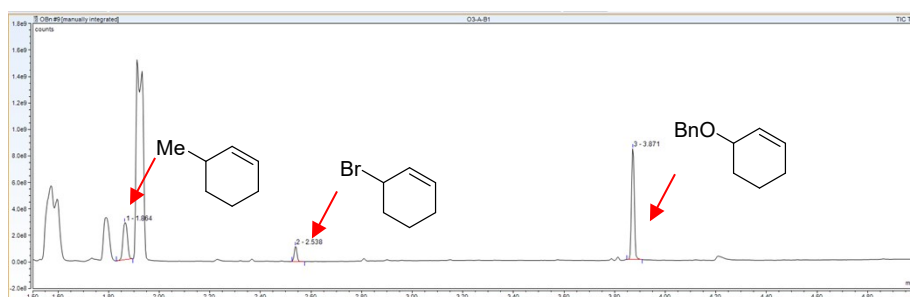

**Fig. S2 GCMS traces of 3c in AAA reaction for 1 h**

## 5.2 GCMS traces of 3c *in situ*

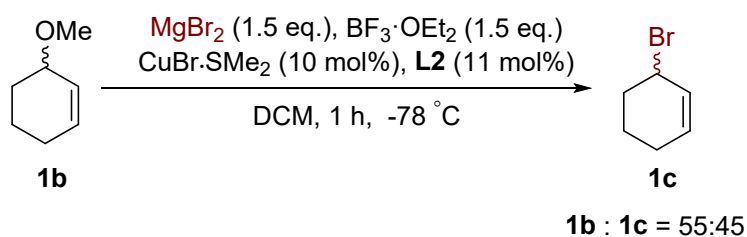

In a flame-dried Schlenk tube under argon atmosphere,  $\text{CuBr} \cdot \text{SMe}_2$  (0.04 mmol, 10 mol%) and the appropriate ligand (0.044 mmol, 11 mol%) were dissolved in dry DCM (4 mL) and the solution was stirred for 15 min at room temperature. Then, the cyclic allylic methyl ether (0.4 mmol) and  $\text{BF}_3 \cdot \text{OEt}_2$  (0.6 mmol, 1.5 equiv.) was added at  $-78\text{ }^\circ\text{C}$ . After 10 min at this temperature, the  $\text{MgBr}_2$  (0.6 mmol, 1.5 equiv.) was added to the reaction mixture. Once the addition was complete, the mixture was stirred for another 1 h at  $-78\text{ }^\circ\text{C}$ .



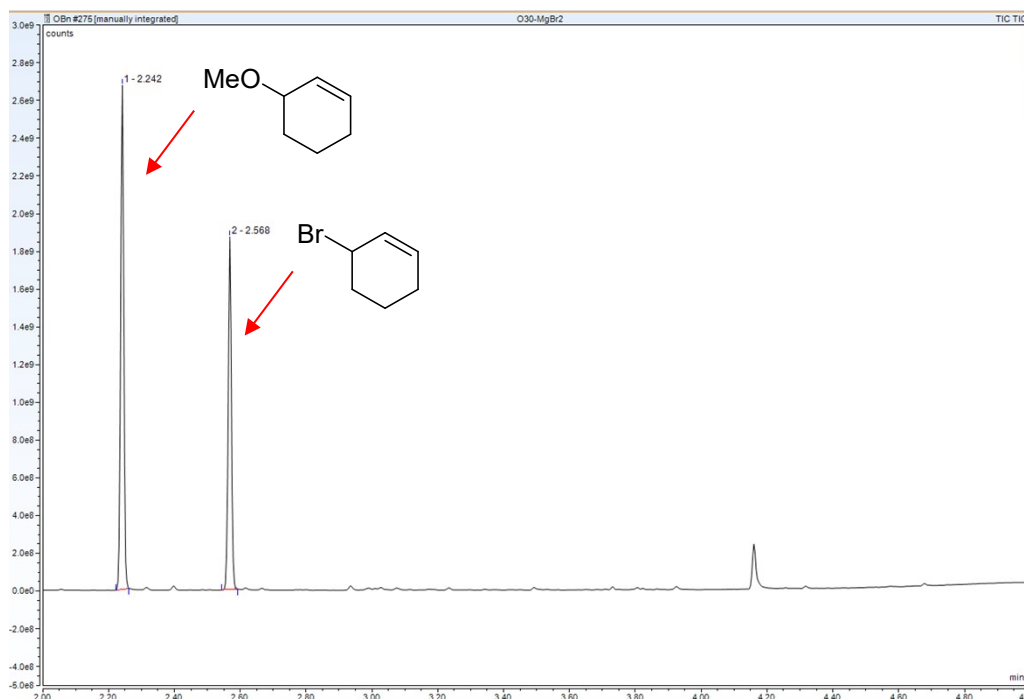

Fig. S3 GCMS traces of **3c** *in situ*

## 6 Number of equivalents of catalyst loading

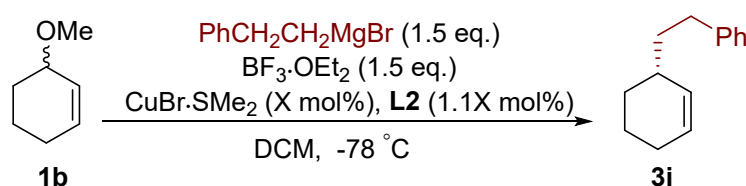

Table S2. Number of equivalents of catalyst loading

| Entry | X  | ee  | Time | Conversion |
|-------|----|-----|------|------------|
| 1     | 10 | 95% | 1 h  | 100%       |
| 2     | 5  | 95% | 1 h  | 92%        |
| 3     | 1  | 94% | 4 h  | 78%        |

## 7 References

- Langlois, J. B.; Alexakis, A., Dynamic kinetic asymmetric transformation in copper catalyzed allylic alkylation. *Chem. Commun.* **2009**, (26), 3868-70.
- Langlois, J.-B.; Alexakis, A., Copper-Catalyzed Asymmetric Allylic Alkylation of Racemic Cyclic Substrates: Application of Dynamic Kinetic Asymmetric Transformation (DYKAT). *Adv. Synth. Catal.* **2010**, 352 (2-3), 447-457.
- Langlois, J.-B.; Emery, D.; Mareda, J.; Alexakis, A., Mechanistic identification and improvement of a direct enantioconvergent transformation in copper-catalyzed asymmetric allylic alkylation. *Chem. Sci.* **2012**, 3 (4), 1062-

1069.

4. You, H.; Rideau, E.; Sidera, M.; Fletcher, S. P., Non-stabilized nucleophiles in Cu-catalysed dynamic kinetic asymmetric allylic alkylation. *Nature* **2015**, *517* (7534), 351-5.
5. Rideau, E.; You, H.; Sidera, M.; Claridge, T. D. W.; Fletcher, S. P., Mechanistic Studies on a Cu-Catalyzed Asymmetric Allylic Alkylation with Cyclic Racemic Starting Materials. *J. Am. Chem. Soc.* **2017**, *139* (15), 5614-5624.
6. Li, J.; Song, X.; Wu, F.; You, H.; Chen, F.-E., Cu-Catalyzed Asymmetric Allylic Alkylation of Racemic Cyclic Allyl Bromides with Organolithium Compounds. *Eur. J. Org. Chem.* **2022**, *2022* (34), e202200860.

## 8 Spectroscopic and Chromatographic datas

### (S)-3-methylcyclohex-1-ene (3a)

Highly volatile colorless oil. 99% GC yield, 98% *ee*. The enantiomeric excess was determined by GC on chiral stationary phase (Supelco  $\gamma$ -Dex-225 column, Method: 25-35-10-200-5, RT: 29.04 (R), 29.27 (S) min). The enantiomeric excess was also determined by GC on a chiral stationary phase after derivatisation in corresponding epoxides. (CP-Chiralsil-Dex-CB column, Method: 60-0-1-170, RT: 17.27, 17.81, 19.30, 20.00 min)  $^1\text{H}$  NMR (400 MHz, Chloroform-*d*)  $\delta_{\text{H}}$  /ppm  $^1\text{H}$  NMR (400 MHz, Chloroform-*d*)  $\delta$  5.70 – 5.57 (m, 1H), 5.57 – 5.48 (m, 1H), 2.26 – 2.08 (m, 1H), 2.04 – 1.90 (m, 2H), 1.84 – 1.64 (m, 2H), 1.59 – 1.44 (m, 1H), 1.27 – 1.10 (m, 1H), 0.97 (d,  $J = 7.1$  Hz, 3H);  $^{13}\text{C}$  NMR (100 MHz, Chloroform-*d*)  $\delta_{\text{C}}$  /ppm 133.6, 126.3, 31.3, 30.1, 25.1, 21.7, 21.4.

HRMS (ESI) calcd for  $\text{C}_7\text{H}_{13}^+$  [(M+H) $^+$ ] 97.1012, found 97.1010.

### GC traces

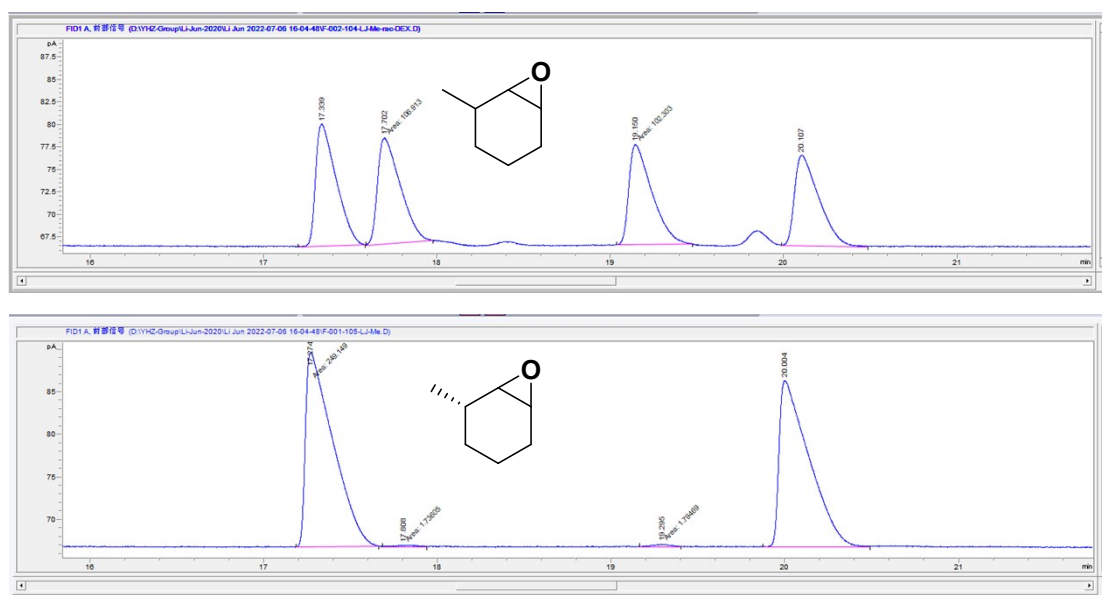

| Peak # | RetTime [min] | Type | Width [min] | Area [pA*s] | Height [pA] | Area %   |
|--------|---------------|------|-------------|-------------|-------------|----------|
| 1      | 17.274        | MM   | 0.1819      | 249.14888   | 22.82720    | 51.34979 |
| 2      | 17.808        | MM   | 0.1440      | 1.73605     | 2.00960e-1  | 0.35780  |
| 3      | 19.295        | MM   | 0.1045      | 1.79469     | 2.86319e-1  | 0.36989  |
| 4      | 20.004        | BB   | 0.1571      | 232.51979   | 19.55562    | 47.92252 |

### (S)-3-ethylcyclohex-1-ene (3b)

Volatile colorless oil. 31.2 mg, 71% isolated yield, 91% *ee*. The enantiomeric excess was determined by GC on a chiral stationary phase after derivatisation in corresponding epoxides (Hydrodex  $\beta$ -6 TBDM column, Method: 60-0-5-170-5, RT:11.67, 11.83, 12.73, 13.11 min).  $^1\text{H}$  NMR (400 MHz, Chloroform-*d*)  $\delta_{\text{H}}$ /ppm 5.73 – 5.63 (m, 1H), 5.62 – 5.53 (m, 1H), 2.03 – 1.87 (m, 3H), 1.82 – 1.67 (m, 2H), 1.54 – 1.45 (m, 1H), 1.38 – 1.18 (m, 3H), 0.91 (t,  $J = 7.4$  Hz, 3H);  $^{13}\text{C}$  NMR (100 MHz, Chloroform-*d*)  $\delta_{\text{C}}$  /ppm 132.1, 126.7, 36.9, 29.0, 28.7, 25.4, 21.6, 11.4.

$[\alpha]_{\text{D}}^{25} = -82.4$  ( $c = 0.1$  in  $\text{CHCl}_3$ )

HRMS (ESI) calcd for  $\text{C}_8\text{H}_{15}^+$  [(M+H) $^+$ ] 111.1168, found 111.1172.

### GC traces

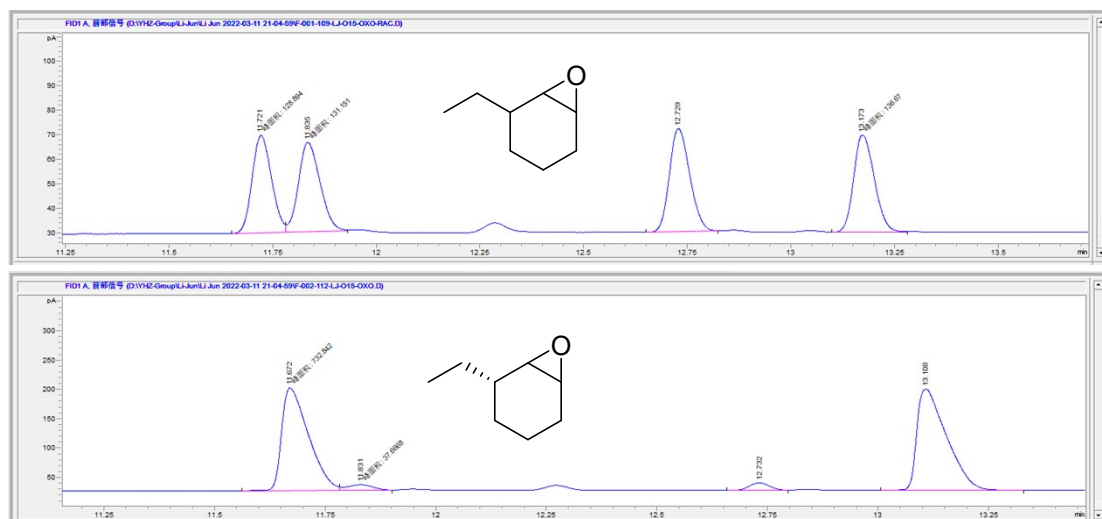

| Peak # | RetTime [min] | Type | Width [min] | Area [pA*s] | Height [pA] | Area %   |
|--------|---------------|------|-------------|-------------|-------------|----------|
| 1      | 11.672        | MF   | 0.0698      | 732.84210   | 174.98895   | 45.55416 |
| 2      | 11.831        | FM   | 0.0674      | 37.66683    | 9.31460     | 2.34141  |
| 3      | 12.732        | BB   | 0.0496      | 39.78463    | 12.61672    | 2.47305  |
| 4      | 13.108        | BB   | 0.0645      | 798.43341   | 172.15292   | 49.63138 |

## (S)-3-butylcyclohex-1-ene 3c

Volatile colorless oil. 45.9 mg, 83% isolated yield, 96% *ee*. The enantiomeric excess was determined by GC on a chiral stationary phase after derivatisation in corresponding epoxides (Hydrodex  $\beta$ -6 TBDM column, Method: 60-0-1-170-5, RT: 47.21, 48.36, 53.26, 55.15 min).  $^1\text{H}$  NMR (400 MHz, Chloroform-*d*)  $\delta_{\text{H}}$ /ppm 5.70 – 5.62 (m, 1H), 5.62 – 5.55 (m, 1H), 2.09 – 2.00 (m, 1H), 2.00 – 1.94 (m, 2H), 1.83 – 1.64 (m, 2H), 1.60 – 1.44 (m, 1H), 1.37 – 1.18 (m, 7H), 0.97 – 0.83 (m, 3H);  $^{13}\text{C}$  NMR (100 MHz, Chloroform-*d*)  $\delta_{\text{C}}$ /ppm 132.3, 126.5, 36.2, 35.2, 29.3, 29.2, 25.4, 23.0, 21.6, 14.1.

$[\alpha]_{\text{D}}^{25} = -62.3$  ( $c = 0.21$  in  $\text{CHCl}_3$ )

HRMS (ESI) calcd for  $\text{C}_{10}\text{H}_{19}^+$  [(M+H) $^+$ ] 139.1481, found 139.1480.

### GC traces

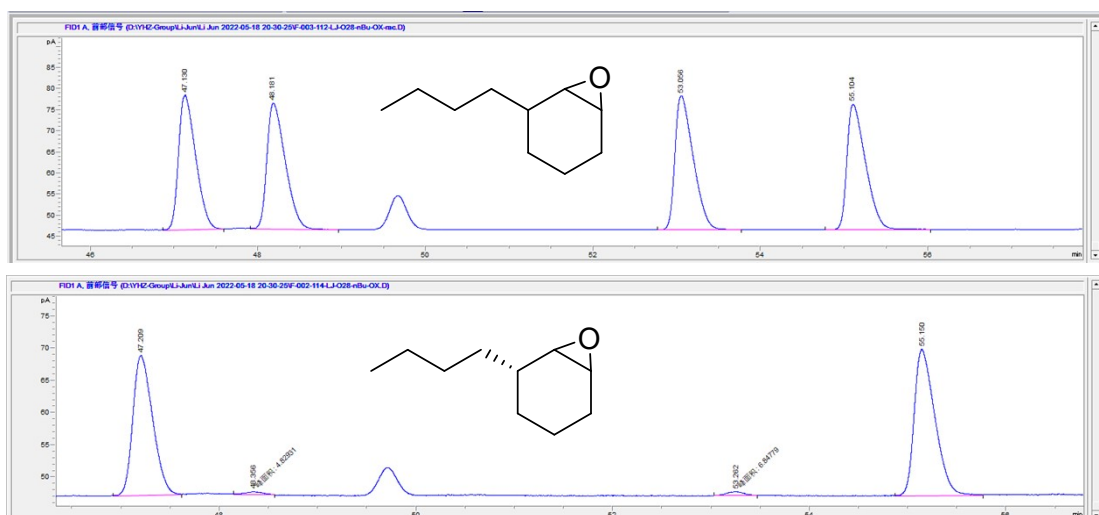

| Peak # | RetTime [min] | Type | Width [min] | Area [pA*s] | Height [pA] | Area %   |
|--------|---------------|------|-------------|-------------|-------------|----------|
| 1      | 47.209        | BB   | 0.1921      | 303.37531   | 21.67071    | 46.96106 |
| 2      | 48.356        | MM   | 0.1874      | 4.82931     | 4.29422e-1  | 0.74755  |
| 3      | 53.262        | MM   | 0.1906      | 6.84779     | 5.98719e-1  | 1.06000  |
| 4      | 55.150        | BB   | 0.2189      | 330.96216   | 22.69435    | 51.23138 |

## (R)-3-isobutylcyclohex-1-ene (3d)

Volatile colorless oil. 43.8 mg, 79% isolated yield, 88% *ee*. The enantiomeric excess was determined by GC on a chiral stationary phase after derivatisation in corresponding epoxides (CP-Chiralsil-Dex-CB column, Method: 60-0-1-120-0-10-200-5, RT: 51.14, 51.75, 53.80, 54.65 min)  $^1\text{H}$  NMR (400 MHz, Chloroform-*d*)  $\delta_{\text{H}}$  /ppm 5.68 – 5.61 (m, 1H), 5.60 – 5.52 (m, 1H), 2.18 – 2.07 (m, 1H), 2.03 – 1.91 (m, 2H), 1.82 – 1.65 (m, 3H), 1.58 – 1.45 (m, 1H), 1.24 – 1.07 (m, 3H), 0.89 (t,  $J = 6.8$  Hz, 6H);  $^{13}\text{C}$  NMR (100 MHz, Chloroform-*d*)  $\delta_{\text{C}}$  /ppm 132.4, 126.5, 45.9, 32.7, 29.3, 25.5, 24.9, 23.1, 22.5, 21.4.

$[\alpha]_{589}^{25} = -40.6$  ( $c = 0.14$  in  $\text{CHCl}_3$ )

HRMS (ESI) calcd for  $\text{C}_{10}\text{H}_{19}^+$  [(M+H) $^+$ ] 139.1481, found 139.1482.

## GC traces

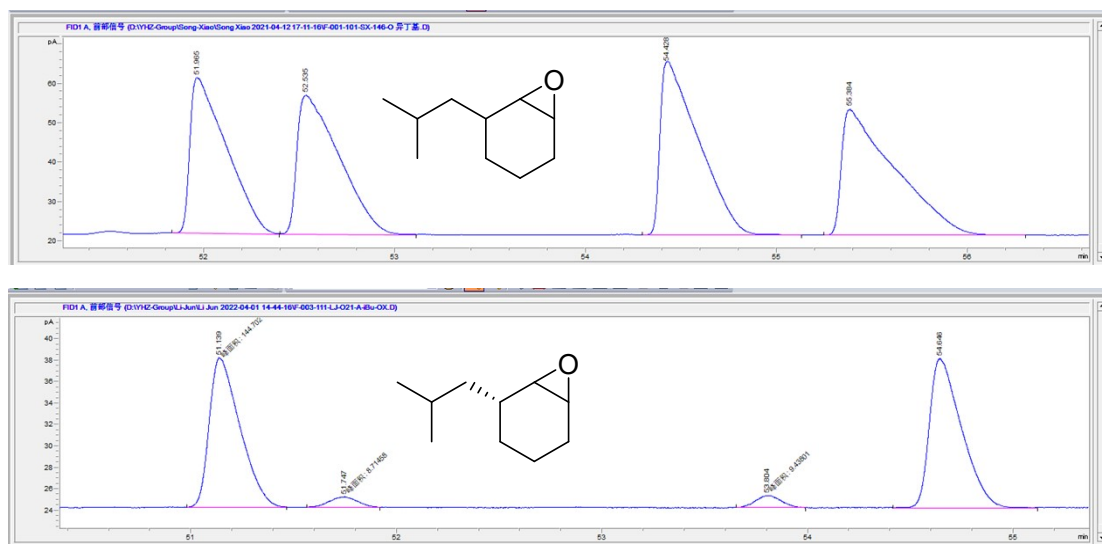

| Peak # | RetTime [min] | Type | Width [min] | Area [pA*s] | Height [pA] | Area %   |
|--------|---------------|------|-------------|-------------|-------------|----------|
| 1      | 51.139        | MM   | 0.1727      | 144.70184   | 13.96224    | 46.08189 |
| 2      | 51.747        | MM   | 0.1541      | 8.71458     | 9.42241e-1  | 2.77525  |
| 3      | 53.804        | MM   | 0.1413      | 9.43801     | 1.11350     | 3.00564  |
| 4      | 54.646        | BB   | 0.1584      | 151.15579   | 13.95419    | 48.13722 |

### (S)-3-heptylcyclohex-1-ene (3e)

Colorless oil. 57.5 mg, 80% isolated yield, 97% *ee*. The enantiomeric excess was determined by GC on a chiral stationary phase after derivatisation in corresponding epoxides (Hydrodex  $\beta$ -6 TBDM column, Method: 60-0-1-140-0-20-170-5, RT: 81.84, 82.30, 83.40, 83.99 min).  $^1\text{H}$  NMR (400 MHz, Chloroform-*d*)  $\delta_{\text{H}}$ /ppm 5.70 – 5.61 (m, 1H), 5.62 – 5.54 (m, 1H), 2.13 – 1.89 (m, 3H), 1.82 – 1.65 (m, 2H), 1.55 – 1.43 (m, 1H), 1.33 – 1.21 (m, 13H), 0.88 (t,  $J = 6.8$  Hz, 3H);  $^{13}\text{C}$  NMR (100 MHz, Chloroform-*d*)  $\delta_{\text{C}}$ /ppm 132.4, 126.6, 36.4, 35.2, 31.9, 29.9, 29.4, 29.1, 27.0, 25.4, 22.7, 21.6, 14.1.

$[\alpha]_{589}^{25} = -5.4$  ( $c = 0.18$  in  $\text{CHCl}_3$ )

HRMS (ESI) calcd for  $\text{C}_{13}\text{H}_{25}^+$  [(M+H) $^+$ ] 181.1951, found 181.1948.

### GC traces

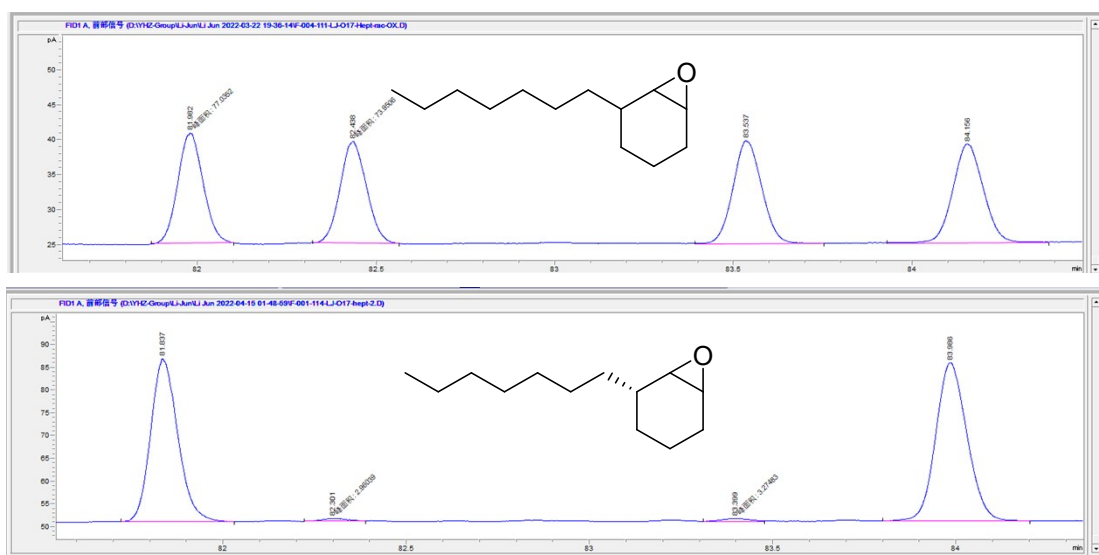

| Peak # | RetTime [min] | Type | Width [min] | Area [pA*s] | Height [pA] | Area %   |
|--------|---------------|------|-------------|-------------|-------------|----------|
| 1      | 81.837        | BB   | 0.0753      | 184.42480   | 35.80082    | 46.45978 |
| 2      | 82.301        | MM   | 0.0831      | 2.96039     | 5.93749e-1  | 0.74577  |
| 3      | 83.399        | MM   | 0.0841      | 3.27483     | 6.49026e-1  | 0.82499  |
| 4      | 83.986        | BB   | 0.0933      | 206.29578   | 34.74703    | 51.96946 |

### (S)-3-dodecylcyclohex-1-ene (3f)

Colorless oil. 95% NMR yield, 94% *ee*. The enantiomeric excess was determined by GC on a chiral stationary phase after derivatisation in corresponding epoxides (CP-Chiralsil-Dex-CB column, Method: 50-0-1-170-30-10-200-5, RT: 81.84, 82.30, 83.40, 83.99 min).  $^1\text{H}$  NMR (400 MHz, Chloroform-*d*)  $\delta_{\text{H}}$  /ppm 5.68 – 5.62 (m, 1H), 5.62 – 5.54 (m, 1H), 2.10 – 1.91 (m, 3H), 1.85 – 1.67 (m, 2H), 1.59 – 1.47 (m, 1H), 1.33 – 1.26 (m, 23H), 0.89 (t,  $J = 6.9$  Hz, 3H).;  $^{13}\text{C}$  NMR (100 MHz, Chloroform-*d*)  $\delta_{\text{C}}$  /ppm 132.4, 126.6, 36.4, 35.2, 31.9, 29.9, 29.7 (m, 5C), 29.4, 29.1, 27.0, 25.4, 22.7, 21.6, 14.1.

$[\alpha]_{\text{D}}^{25} = -25.4$  ( $c = 0.45$  in  $\text{CHCl}_3$ )

HRMS (ESI) calcd for  $\text{C}_{18}\text{H}_{35}^+$   $[(\text{M}+\text{H})^+]$  251.2733, found 251.2728.

### GC traces

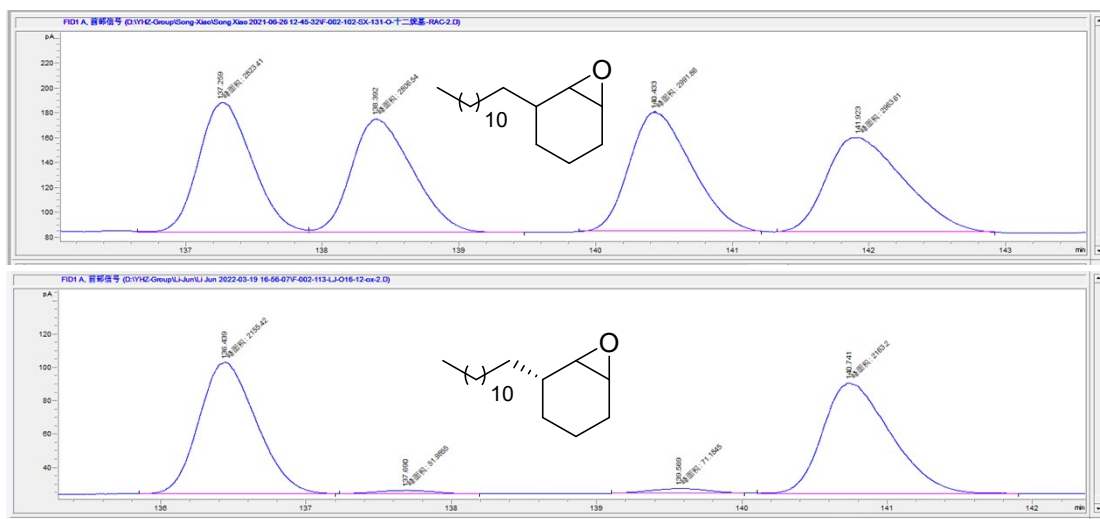

| Peak # | RetTime [min] | Type | Width [min] | Area [pA*s] | Height [pA] | Area %   |
|--------|---------------|------|-------------|-------------|-------------|----------|
| 1      | 136.439       | MM   | 0.4558      | 2155.41577  | 78.81336    | 48.52590 |
| 2      | 137.690       | MM   | 0.4272      | 51.98553    | 2.02816     | 1.17037  |
| 3      | 139.569       | MM   | 0.4463      | 71.18447    | 2.65829     | 1.60261  |
| 4      | 140.741       | MM   | 0.5426      | 2163.19849  | 66.44946    | 48.70112 |



## (R)-3-(4-methylpent-3-en-1-yl)cyclohex-1-ene (3g)

Colorless oil. 51.3 mg, 78% isolated yield, 97% *ee*. The enantiomeric excess was determined by GC on a chiral stationary phase (Hydrodex B3P column, Method: 40-0-1-110-0-5-170-5, RT: 61.86, 62.24 min).  $^1\text{H}$  NMR (400 MHz, Chloroform-*d*)  $\delta_{\text{H}}$ /ppm 5.73 – 5.63 (m, 1H), 5.62 – 5.52 (m, 1H), 5.14 – 5.08 (m, 1H), 2.08 – 2.01 (m, 2H), 2.00 – 1.92 (m, 3H), 1.82 – 1.74 (m, 1H), 1.69 (s, 3H), 1.61 (s, 3H), 1.54 – 1.45 (m, 1H), 1.43 – 1.13 (m, 4H);  $^{13}\text{C}$  NMR (100 MHz, Chloroform-*d*)  $\delta_{\text{C}}$ /ppm 132.2, 131.3, 126.7, 124.7, 36.4, 34.7, 29.0, 25.7, 25.4, 21.5, 17.6.

$[\alpha]_{\text{D}}^{25} = -62.7$  ( $c = 0.35$  in  $\text{CHCl}_3$ )

HRMS (ESI) calcd for  $\text{C}_{12}\text{H}_{21}^+$   $[(\text{M}+\text{H})^+]$  165.1638, found 165.1637.

### GC traces

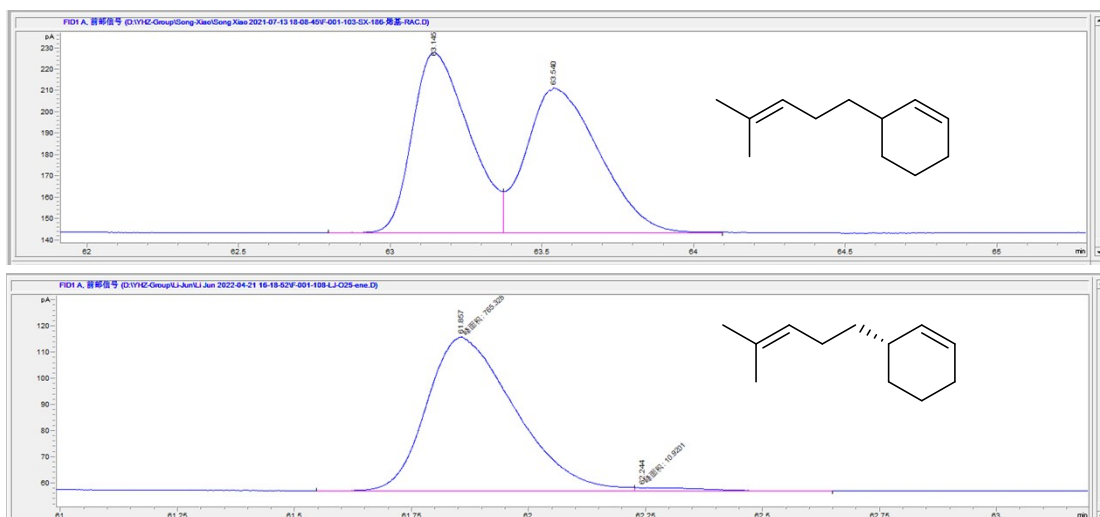

| Peak # | RetTime [min] | Type | Width [min] | Area [pA*s] | Height [pA] | Area %   |
|--------|---------------|------|-------------|-------------|-------------|----------|
| 1      | 61.857        | MF   | 0.2167      | 765.32806   | 58.85297    | 98.59322 |
| 2      | 62.244        | FM   | 0.1505      | 10.92007    | 1.20915     | 1.40678  |

## (R)-(cyclohex-2-en-1-ylmethyl)benzene (3h)

Colorless oil. 62 mg, 90% isolated yield, 65% *ee*. The enantiomeric excess was determined by GC on a chiral stationary phase after derivatisation in corresponding epoxides (CP-Chiralsil-Dex-CB column, Method: 30-0-1-150-0-10-200-5, RT: 123.55, 123.79, 124.68, 124.93 min). <sup>1</sup>H NMR (400 MHz, Chloroform-*d*)  $\delta_{\text{H}}$ /ppm 7.31 – 7.23 (m, 2H), 7.22 – 7.12 (m, 3H), 5.75 – 5.64 (m, 1H), 5.62 – 5.51 (m, 1H), 2.70 – 2.58 (m, 1H), 2.56 – 2.48 (m, 1H), 2.42 – 2.30 (m, 1H), 2.05 – 1.92 (m, 2H), 1.77 – 1.62 (m, 2H), 1.56 – 1.41 (m, 1H), 1.33 – 1.18 (m, 1H); <sup>13</sup>C NMR (100 MHz, Chloroform-*d*)  $\delta_{\text{C}}$ /ppm 140.8, 131.3, 129.1, 128.1, 127.3, 125.7, 42.7, 37.2, 28.9, 25.4, 21.3.

$[\alpha]_{\text{D}}^{25} = -18.5$  ( $c = 0.21$  in  $\text{CHCl}_3$ )

HRMS (ESI) calcd for  $\text{C}_{13}\text{H}_{17}^+$  [(M+H)<sup>+</sup>] 173.1325, found 173.1322.

### GC traces

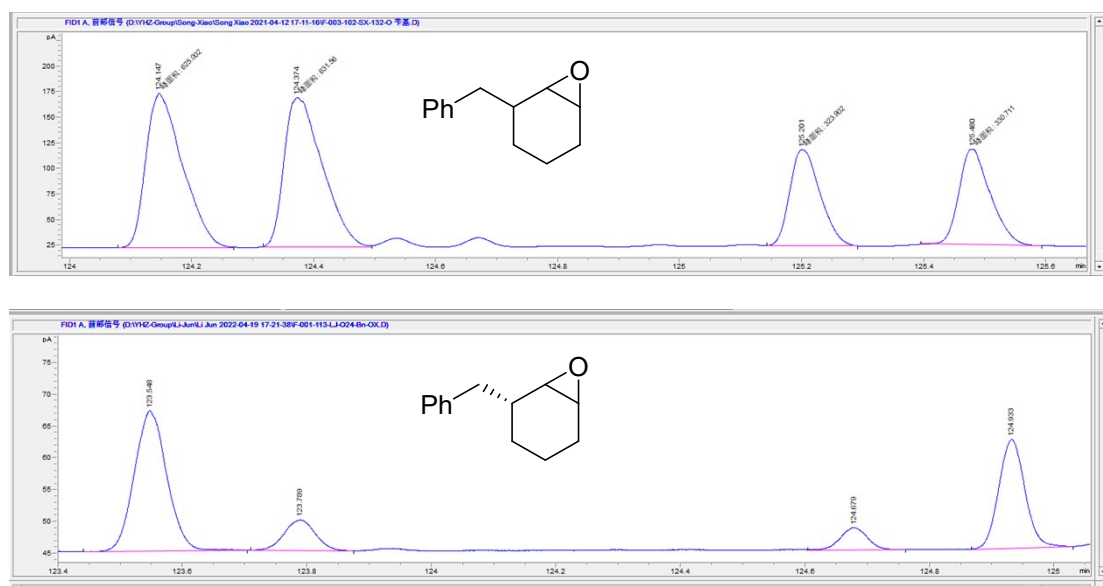

| Peak # | RetTime [min] | Type | Width [min] | Area [pA*s] | Height [pA] | Area %   |
|--------|---------------|------|-------------|-------------|-------------|----------|
| 1      | 123.548       | BB   | 0.0561      | 80.21606    | 22.04475    | 50.99786 |
| 2      | 123.789       | BB   | 0.0544      | 16.81706    | 4.80495     | 10.69155 |
| 3      | 124.679       | BB   | 0.0475      | 10.46578    | 3.51617     | 6.65369  |
| 4      | 124.933       | BB   | 0.0460      | 49.79411    | 17.06130    | 31.65691 |

## (R)-2-(cyclohex-2-en-1-yl)ethyl)benzene (3i)

Colorless oil. 64.5 mg, 87% isolated yield, 95% *ee*. The enantiomeric excess was determined by GC on a chiral stationary phase (Hydrodex B3P column, Method: 60-30-1-150-0-20-170-5, RT: 110.69, 111.12 min). <sup>1</sup>H NMR (400 MHz, Chloroform-*d*) δ<sub>H</sub>/ppm 7.31 – 7.26 (m, 2H), 7.23 – 7.13 (m, 3H), 5.74 – 5.66 (m, 1H), 5.66 – 5.59 (m, 1H), 2.71 – 2.61 (m, 2H), 2.14 – 2.05 (m, 1H), 2.03 – 1.94 (m, 2H), 1.88 – 1.80 (m, 1H), 1.79 – 1.70 (m, 1H), 1.69 – 1.56 (m, 2H), 1.54 – 1.46 (m, 1H), 1.32 – 1.27 (m, 1H); <sup>13</sup>C NMR (100 MHz, Chloroform-*d*) δ<sub>C</sub>/ppm 142.8, 131.7, 128.4, 128.3, 127.1, 125.6, 38.2, 34.7, 33.3, 29.0, 25.4, 21.5.

[α]<sub>D</sub><sup>25</sup><sub>589</sub> = -25.8 (c = 0.36 in CHCl<sub>3</sub>)

HRMS (ESI) calcd for C<sub>14</sub>H<sub>19</sub><sup>+</sup> [(M+H)<sup>+</sup>] 187.1481, found 187.1480.

### GC traces

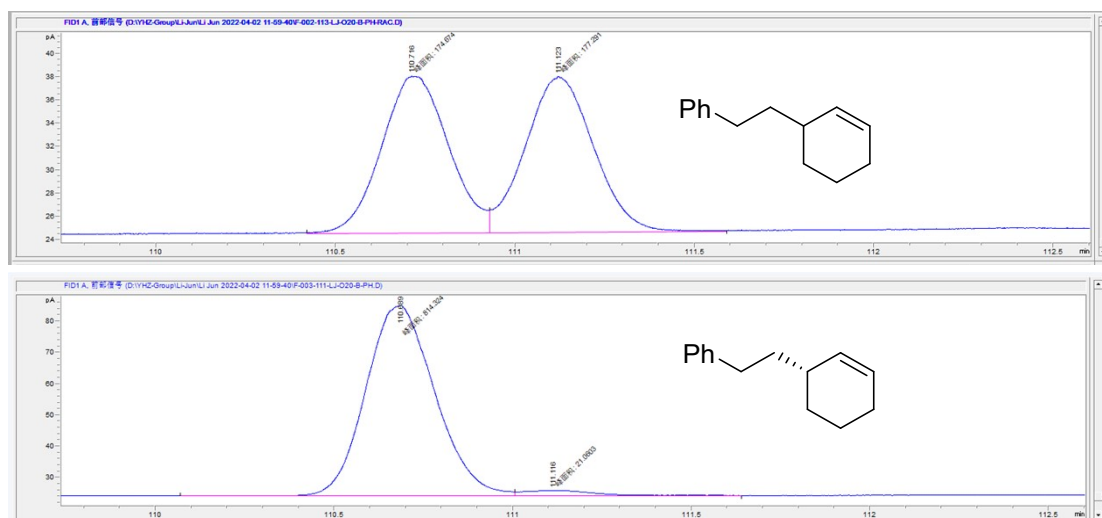

| Peak # | RetTime [min] | Type | Width [min] | Area [pA*s] | Height [pA] | Area %   |
|--------|---------------|------|-------------|-------------|-------------|----------|
| 1      | 110.689       | MF   | 0.2230      | 814.32385   | 60.84980    | 97.47897 |
| 2      | 111.116       | FM   | 0.2179      | 21.06026    | 1.61104     | 2.52103  |

### (R)-1-(2-(cyclohex-2-en-1-yl)ethyl)-4-methoxybenzene (3j)

Colorless oil, 96% *ee*.  $[\alpha]_D^{25} = -49.3$  ( $c = 0.1$  in  $\text{CHCl}_3$ ). HRMS (ESI) calcd for  $\text{C}_{15}\text{H}_{21}\text{O}^+$   $[(\text{M}+\text{H})^+]$  217.1587, found 217.1585. Colorless oil isolated after derivatisation in corresponding epoxides. After treatment with *m*CPBA, **2-(4-methoxyphenethyl)-7-oxabicyclo[4.1.0]heptane (6j)** is isolated as a mixture of diastereoisomeric epoxides (1:1). 75.4 mg, 81% isolated yield (after two steps). The enantiomeric excess was determined by GC on a chiral stationary phase after derivatisation in corresponding epoxides (CP-Chiralsil-Dex-CB column, Method: 80-0-1-200-10, RT: 100.04, 100.83, 101.88, 102.50 min).  $^1\text{H}$  NMR (400 MHz, Chloroform-*d*)  $\delta_{\text{H}}$ /ppm  $\delta$  7.16 – 7.09 (m, 2H), 6.88 – 6.80 (m, 2H), 3.79 (s, 3H), 3.21 – 3.10 (m, 1.5H), 2.92 – 2.89 (m, 0.5H), 2.74 – 2.61 (m, 2H), 2.12 – 2.02 (m, 0.5H), 1.91 – 1.62 (m, 5H), 1.56 – 1.46 (m, 0.5H), 1.45 – 1.29 (m, 1.5H), 1.25 – 1.08 (m, 1H), 0.95 – 0.82 (m, 0.5H);  $^{13}\text{C}$  NMR (100 MHz, Chloroform-*d*)  $\delta_{\text{C}}$ /ppm 157.7, 157.6, 134.5, 143.1, 129.2, 113.8, 113.7, 56.3, 55.5, 55.2, 52.9, 52.8, 36.1, 35.1, 34.1, 33.7, 32.4, 32.2, 27.2, 25.2, 24.8, 23.9, 19.8, 17.2. HRMS (ESI) calcd for  $\text{C}_{15}\text{H}_{21}\text{O}_2^+$   $[(\text{M}+\text{H})^+]$  233.1536, found 233.1536.

### GC traces

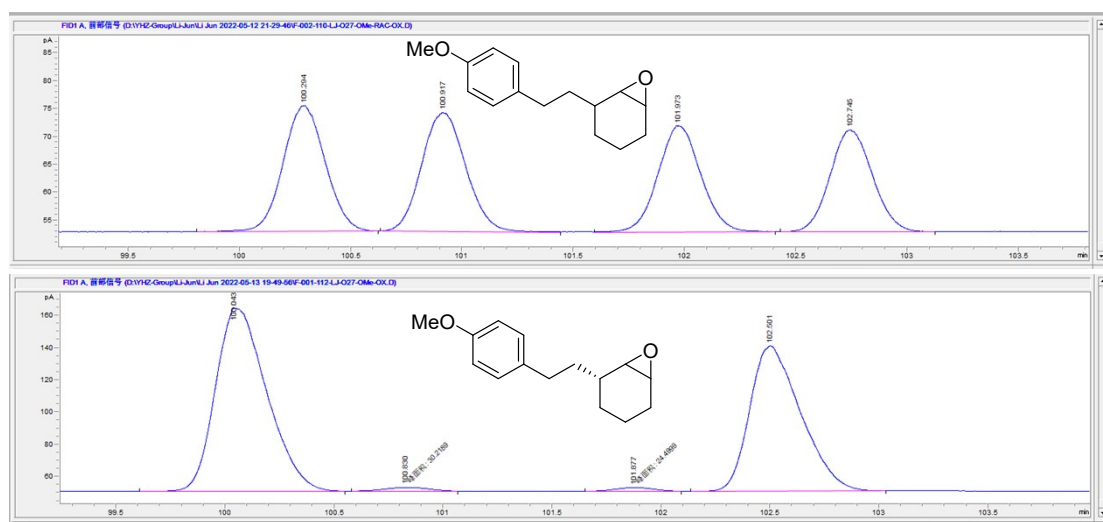

| Peak # | RetTime [min] | Type | Width [min] | Area [pA*s] | Height [pA] | Area %   |
|--------|---------------|------|-------------|-------------|-------------|----------|
| 1      | 100.043       | BB   | 0.1984      | 1863.43774  | 113.72225   | 55.11419 |
| 2      | 100.830       | MM   | 0.2196      | 30.21889    | 2.29393     | 0.89377  |
| 3      | 101.877       | MM   | 0.1848      | 24.49990    | 2.20961     | 0.72462  |
| 4      | 102.501       | BB   | 0.2063      | 1462.89233  | 90.05285    | 43.26741 |

## (R)-1-(2-(cyclohex-2-en-1-yl)ethyl)-4-(trifluoromethyl)benzene (3k)

Colorless oil. 65.7 mg, 65% isolated yield, 97% *ee*. The enantiomeric excess was determined by GC on a chiral stationary phase (Hydrodex B3P column, Method: 60-30-1-170-5, RT: 113.87, 114.18 min).  $^1\text{H}$  NMR (400 MHz, Chloroform-*d*)  $\delta_{\text{H}}$ /ppm  $\delta$  7.56 – 7.51 (m, 2H), 7.34 – 7.27 (m, 2H), 5.77 – 5.68 (m, 1H), 5.67 – 5.58 (m, 1H), 2.79 – 2.65 (m, 2H), 2.19 – 2.06 (m, 1H), 2.05 – 1.95 (m, 2H), 1.90 – 1.80 (m, 1H), 1.80 – 1.58 (m, 3H), 1.57 – 1.47 (m, 1H), 1.35 – 1.22 (m, 1H);  $^{13}\text{C}$  NMR (100 MHz, Chloroform-*d*)  $\delta_{\text{C}}$ /ppm 147.0, 131.3, 128.6, 128.0 (q,  $J = 32.3$  Hz), 127.5, 125.2 (q,  $J = 4.0$  Hz), 124.4 (q,  $J = 272.7$  Hz), 37.9, 34.7, 33.1, 29.0, 25.3, 21.4.  $^{19}\text{F}$  NMR (380 MHz, Chloroform-*d*)  $\delta$  -62.2.

$[\alpha]_{\text{D}}^{25} = -15.7$  ( $c = 0.25$  in  $\text{CHCl}_3$ )

HRMS (ESI) calcd for  $\text{C}_{15}\text{H}_{18}\text{F}_3^+$  [(M+H) $^+$ ] 255.1355, found 255.1355.

### GC traces

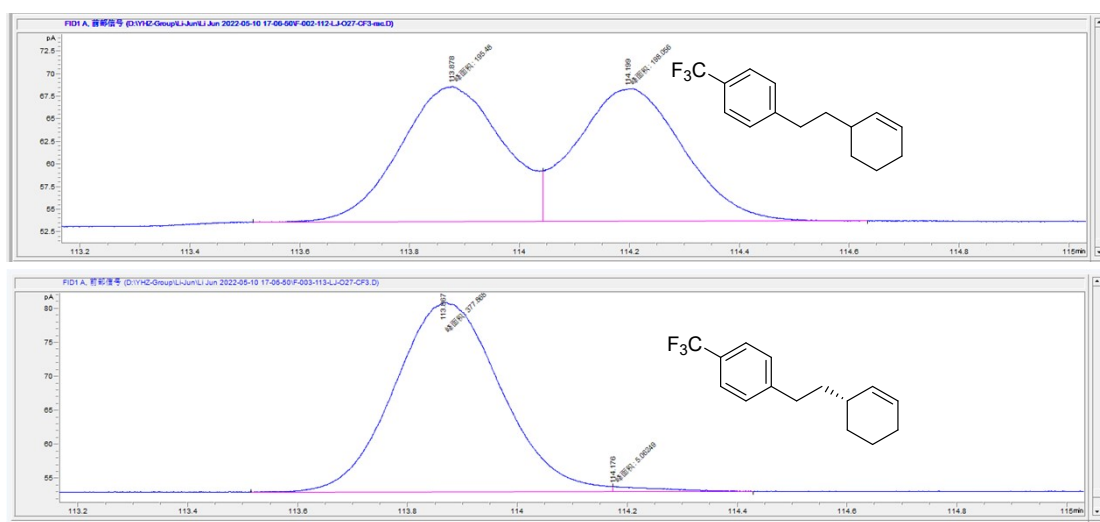

| Peak # | RetTime [min] | Type | Width [min] | Area [pA*s] | Height [pA] | Area %   |
|--------|---------------|------|-------------|-------------|-------------|----------|
| 1      | 113.867       | MF   | 0.2256      | 377.86826   | 27.91684    | 98.67796 |
| 2      | 114.176       | FM   | 0.1110      | 5.06249     | 7.60022e-1  | 1.32204  |

## (R)-3-isopropylcyclohex-1-ene (3I)

Colorless oil. 41.1 mg, 83% isolated yield, 82% *ee*. The enantiomeric excess was determined by GC on a chiral stationary phase after derivatisation in corresponding epoxides (CP-Chiralsil-Dex-CB column, Method: 60-0-1-110-0-20-200-5, RT: 33.53, 34.11, 36.96, 37.65 min). <sup>1</sup>H NMR (400 MHz, Chloroform-*d*)  $\delta_{\text{H}}$ /ppm 5.76 – 5.65 (m, 1H), 5.63 – 5.53 (m, 1H), 2.05 – 1.87 (m, 3H), 1.85 – 1.63 (m, 2H), 1.61 – 1.43 (m, 2H), 1.35 – 1.21 (m, 1H), 0.89 (d, *J* = 6.8 Hz, 3H), 0.87 (d, *J* = 6.8 Hz, 3H).; <sup>13</sup>C NMR (100 MHz, Chloroform-*d*)  $\delta_{\text{C}}$ /ppm 130.9, 127.4, 41.7, 32.2, 25.6, 25.4, 22.2, 19.7, 19.4.

$[\alpha]_{\text{D}}^{25} = -25.2$  (c = 0.1 in CHCl<sub>3</sub>)

HRMS (ESI) calcd for C<sub>9</sub>H<sub>17</sub><sup>+</sup> [(M+H)<sup>+</sup>] 125.1325, found 125.1322.

### GC traces

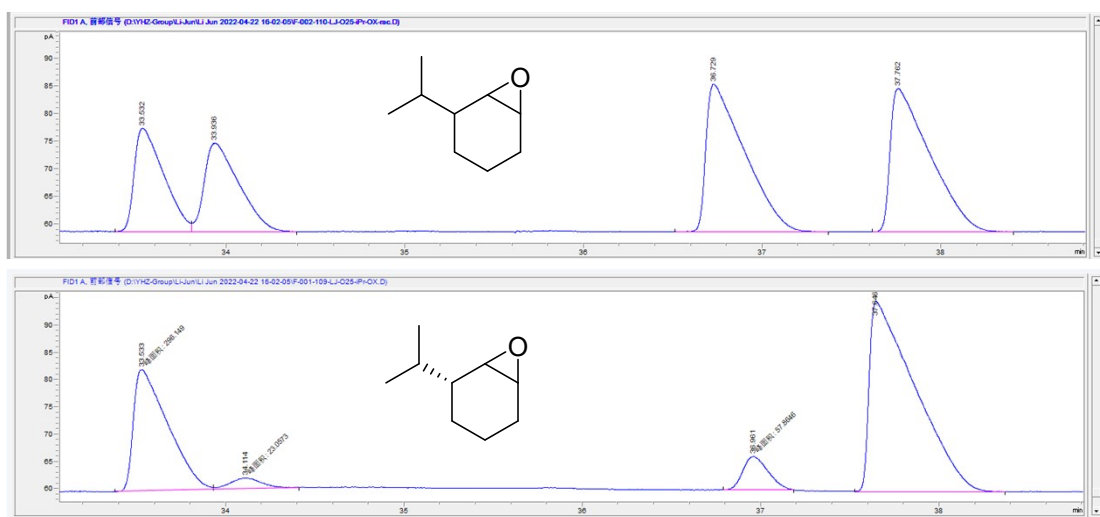

| Peak # | RetTime [min] | Type | Width [min] | Area [pA*s] | Height [pA] | Area %   |
|--------|---------------|------|-------------|-------------|-------------|----------|
| 1      | 33.533        | MF   | 0.2218      | 296.14883   | 22.24910    | 29.64119 |
| 2      | 34.114        | FM   | 0.1976      | 23.05734    | 1.94451     | 2.30778  |
| 3      | 36.961        | MM   | 0.1600      | 57.86464    | 6.02668     | 5.79160  |
| 4      | 37.646        | BB   | 0.2263      | 622.04156   | 34.77803    | 62.25942 |

## (R)-3-cyclopentylcyclohex-1-ene(3m)

Colorless oil. 56 mg, 93% isolated yield, 90% *ee*. The enantiomeric excess was determined by GC on a chiral stationary phase after derivatisation in corresponding epoxides (CP-Chiralsil-Dex-CB column, Method: 60-0-1-170-5, RT: 64.47, 68.02, 68.73 min).  $^1\text{H}$  NMR (400 MHz, Chloroform-*d*)  $\delta_{\text{H}}$  /ppm  $\delta$  5.74 – 5.56 (m, 2H), 2.00 – 1.94 (m, 2H), 1.93 – 1.85 (m, 1H), 1.82 – 1.69 (m, 4H), 1.68 – 1.44 (m, 6H), 1.32 – 1.10 (m, 3H);  $^{13}\text{C}$  NMR (100 MHz, Chloroform-*d*)  $\delta_{\text{C}}$  /ppm 131.3, 127.0, 45.7, 40.9, 30.7, 30.2, 28.5, 25.4, 25.4, 25.3, 21.8.

$[\alpha]_{\text{D}}^{25} = -97.2$  ( $c = 0.34$  in  $\text{CHCl}_3$ )

HRMS (ESI) calcd for  $\text{C}_{11}\text{H}_{19}^+$   $[(\text{M}+\text{H})^+]$  151.1481, found 151.1483.

### GC traces

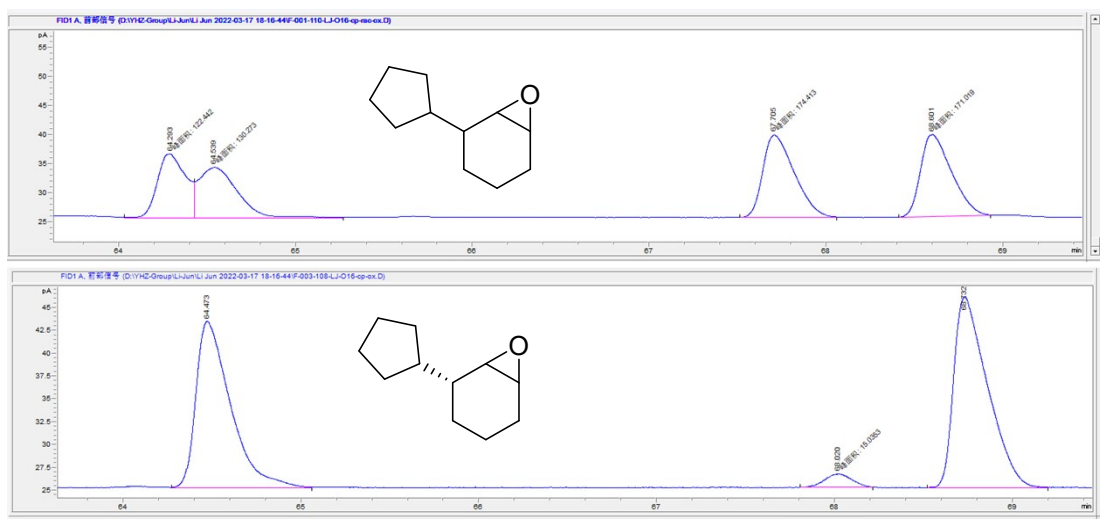

| Peak # | RetTime [min] | Type | Width [min] | Area [pA*s] | Height [pA] | Area %   |
|--------|---------------|------|-------------|-------------|-------------|----------|
| 1      | 64.473        | BB   | 0.1672      | 244.15001   | 18.16501    | 45.66834 |
| 2      | 68.020        | MM   | 0.1744      | 15.03534    | 1.43679     | 2.81236  |
| 3      | 68.732        | BB   | 0.1775      | 275.43008   | 20.93190    | 51.51929 |

## (R)-3-cyclohexylcyclohex-1-ene (3n)

Colorless oil. 92% NMR yield, 88% *ee*. The enantiomeric excess was determined by GC on a chiral stationary phase after derivatisation in corresponding epoxides (Hydrodex  $\beta$ -6 TBDM column, Method: 60-0-1-170-0-10-200-5, RT: 93.40, 93.83, 99.53, 100.26 min).  $^1\text{H}$  NMR (400 MHz, Chloroform-*d*)  $\delta_{\text{H}}$  /ppm 5.73 – 5.65 (m, 1H), 5.64 – 5.57 (m, 1H), 2.00 – 1.88 (m, 3H), 1.75 – 1.64 (m, 7H), 1.54 – 1.42 (m, 1H), 1.23 – 0.95 (m, 7H);  $^{13}\text{C}$  NMR (100 MHz, Chloroform-*d*)  $\delta_{\text{C}}$  /ppm 131.1, 127.2, 42.7, 40.9, 30.3, 29.9, 26.8, 25.8, 25.5, 22.2.

$[\alpha]_{589}^{25} = -52.0$  ( $c = 0.36$  in  $\text{CHCl}_3$ )

HRMS (ESI) calcd for  $\text{C}_{12}\text{H}_{21}^+$  [(M+H) $^+$ ] 165.1638, found 165.1638.

### GC traces

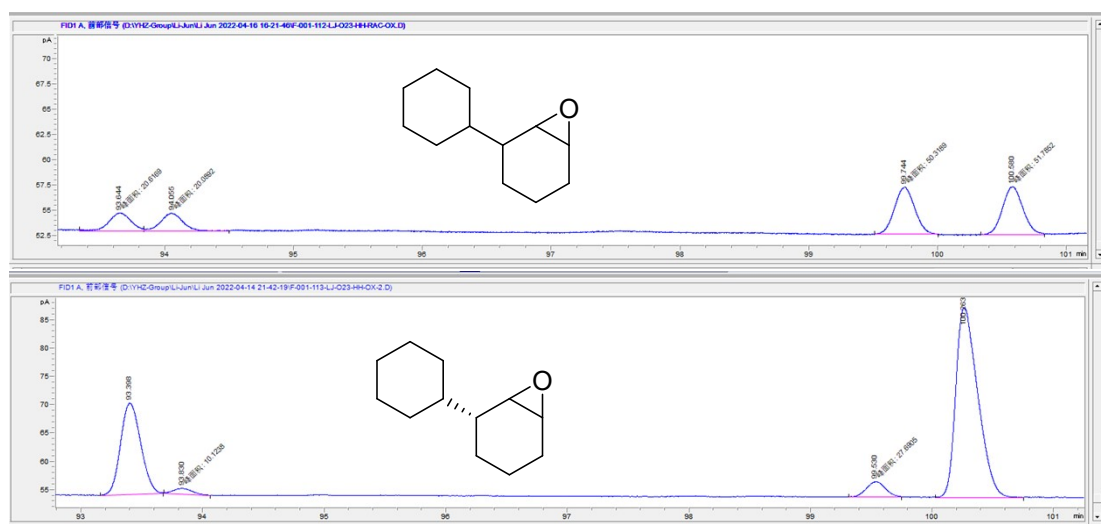

| Peak # | RetTime [min] | Type | Width [min] | Area [pA*s] | Height [pA] | Area %   |
|--------|---------------|------|-------------|-------------|-------------|----------|
| 1      | 93.398        | BB   | 0.1423      | 185.14151   | 16.08185    | 28.70292 |
| 2      | 93.830        | MM   | 0.1692      | 10.12377    | 9.97490e-1  | 1.56951  |
| 3      | 99.530        | MM   | 0.1750      | 27.69049    | 2.63781     | 4.29292  |
| 4      | 100.263       | BB   | 0.1639      | 422.07104   | 33.48516    | 65.43465 |



## (R)-3-cyclobutylcyclohex-1-ene (3o)

Colorless oil. 48.3 mg, 89% isolated yield, 92% *ee*. The enantiomeric excess was determined by GC on a chiral stationary phase after derivatisation in corresponding epoxides (CP-Chiralsil-Dex-CB column, Method: 60-0-1-170-5, RT: 49.01, 49.88, 52.20, 53.06 min).  $^1\text{H}$  NMR (400 MHz, Chloroform-*d*)  $\delta_{\text{H}}$  /ppm 5.73 – 5.64 (m, 1H), 5.63 – 5.54 (m, 1H), 2.14 – 1.93 (m, 6H), 1.88 – 1.66 (m, 6H), 1.54 – 1.42 (m, 1H), 1.16 – 1.01 (m, 1H);  $^{13}\text{C}$  NMR (100 MHz, Chloroform-*d*)  $\delta_{\text{C}}$  /ppm 129.2, 127.0, 41.8, 41.18, 26.7, 26.5, 26.4, 25.4, 21.3, 18.1.

$[\alpha]_{\text{D}}^{25} = -43.4$  ( $c = 0.03$  in  $\text{CHCl}_3$ )

HRMS (ESI) calcd for  $\text{C}_{10}\text{H}_{17}^+$  [(M+H) $^+$ ] 137.1325, found 137.1328.

### GC traces

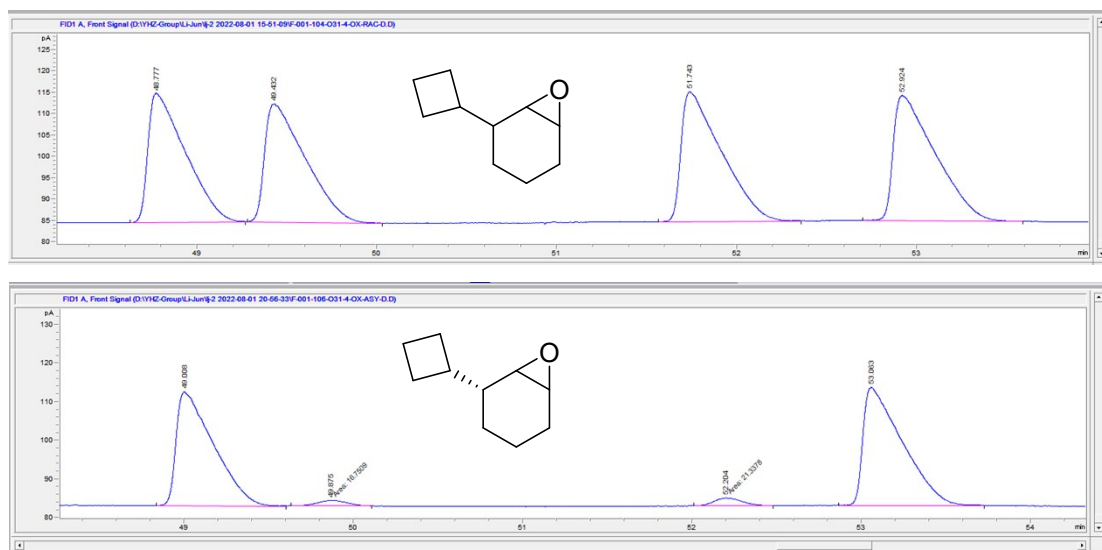

| Peak # | RetTime [min] | Type | Width [min] | Area [pA*s] | Height [pA] | Area %   |
|--------|---------------|------|-------------|-------------|-------------|----------|
| 1      | 49.008        | BB   | 0.1950      | 448.72110   | 29.50691    | 45.84940 |
| 2      | 49.875        | MM   | 0.1984      | 16.75086    | 1.40741     | 1.71157  |
| 3      | 52.204        | MM   | 0.1817      | 21.33775    | 1.95689     | 2.18025  |
| 4      | 53.063        | BB   | 0.2043      | 491.87497   | 30.60146    | 50.25878 |

## (R)-cyclohex-2-en-1-ylcycloheptane (3p)

Colorless oil, 86% *ee*.  $[\alpha]_{589}^{25} = -20.0$  ( $c = 0.11$  in  $\text{CHCl}_3$ ). HRMS (ESI) calcd for  $\text{C}_{13}\text{H}_{23}^+$   $[(\text{M}+\text{H})^+]$  179.1794, found 179.1797. Colorless oil isolated after derivatisation in corresponding epoxides. After treatment with *m*CPBA, **2-cycloheptyl-7-oxabicyclo[4.1.0]heptane (6p)** is isolated as a mixture of diastereoisomeric epoxides (82:18). 67.8 mg, 87% isolated yield (after two steps). The enantiomeric excess was determined by GC on a chiral stationary phase after derivatisation in corresponding epoxides (CP-Chiralsil-Dex-CB column, Method: 80-0-1-155-0-10-170-5, RT: 67.00, 67.54, 70.07, 70.53 min).  $^1\text{H}$  NMR (400 MHz, Chloroform-*d*)  $\delta_{\text{H}}$  /ppm 3.15 – 3.10 (m, 1H), 3.09 – 3.05 (m, 0.18H), 2.91 – 2.87 (m, 0.82H), 2.15 – 1.98 (m, 1H), 1.86 – 1.74 (m, 1H), 1.74 – 1.64 (m, 4H), 1.64 – 1.55 (m, 4H), 1.50 – 1.42 (m, 4H), 1.41 – 1.33 (m, 3H), 1.33 – 1.15 (m, 2H), 0.98 – 0.85 (m, 1H);  $^{13}\text{C}$  NMR (100 MHz, Chloroform-*d*)  $\delta_{\text{C}}$  /ppm 55.9, 55.2, 53.0, 51.6, 43.0, 42.9, 42.0, 41.2, 31.9, 31.8, 31.7, 31.4, 28.4, 28.3, 28.1, 27.9, 27.6, 27.5, 26.9, 26.8, 25.2, 23.8, 23.7, 22.1, 21.1, 17.6. HRMS (ESI) calcd for  $\text{C}_{13}\text{H}_{23}\text{O}^+$   $[(\text{M}+\text{H})^+]$  195.1743, found 195.1744.

## GC traces

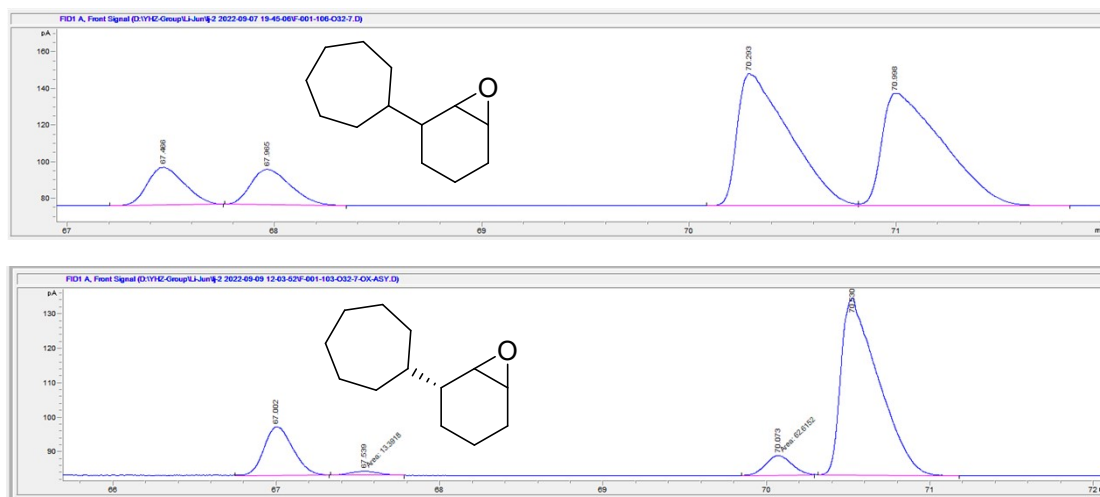

| Peak # | RetTime [min] | Type | Width [min] | Area [pA*s] | Height [pA] | Area %   |
|--------|---------------|------|-------------|-------------|-------------|----------|
| 1      | 67.002        | BB   | 0.1515      | 173.11807   | 14.00114    | 16.21157 |
| 2      | 67.539        | MM   | 0.1964      | 13.39177    | 1.13656     | 1.25407  |
| 3      | 70.073        | MM   | 0.1835      | 62.61515    | 5.68822     | 5.86357  |
| 4      | 70.530        | BB   | 0.1930      | 818.74231   | 51.41635    | 76.67079 |

## (R)-3-methylcyclohept-1-ene (4a)

Volatile colorless oil. 33.2 mg, 75% isolated yield, 91% *ee*. The enantiomeric excess was determined by GC on a chiral stationary phase after derivatisation in corresponding epoxides (Hydrodex  $\beta$ -6 TBDM column, Method: 50-30-1-120-5-10-180-9, RT: 75.04, 75.77, 82.36, 83.38 min).  $^1\text{H}$  NMR (400 MHz, Chloroform-*d*)  $\delta_{\text{H}}$  /ppm 5.77 – 5.65 (m, 1H), 5.54 – 5.39 (m, 1H), 2.42 – 2.27 (m, 1H), 2.21 – 2.02 (m, 2H), 1.98 – 1.85 (m, 1H), 1.73 – 1.63 (m, 1H), 1.60 – 1.49 (m, 2H), 1.35 – 1.27 (m, 1H), 1.25 – 1.16 (m, 1H), 1.03 (d,  $J = 7.2$  Hz, 3H);  $^{13}\text{C}$  NMR (100 MHz, Chloroform-*d*)  $\delta_{\text{C}}$  /ppm 139.4, 130.6, 35.9, 34.5, 30.6, 28.9, 27.0, 23.2.

$[\alpha]_{\text{D}}^{25} = +9.9$  ( $c = 0.13$  in  $\text{CHCl}_3$ )

HRMS (ESI) calcd for  $\text{C}_8\text{H}_{15}^+$  [(M+H) $^+$ ] 111.1168, found 111.1169.

### GC traces

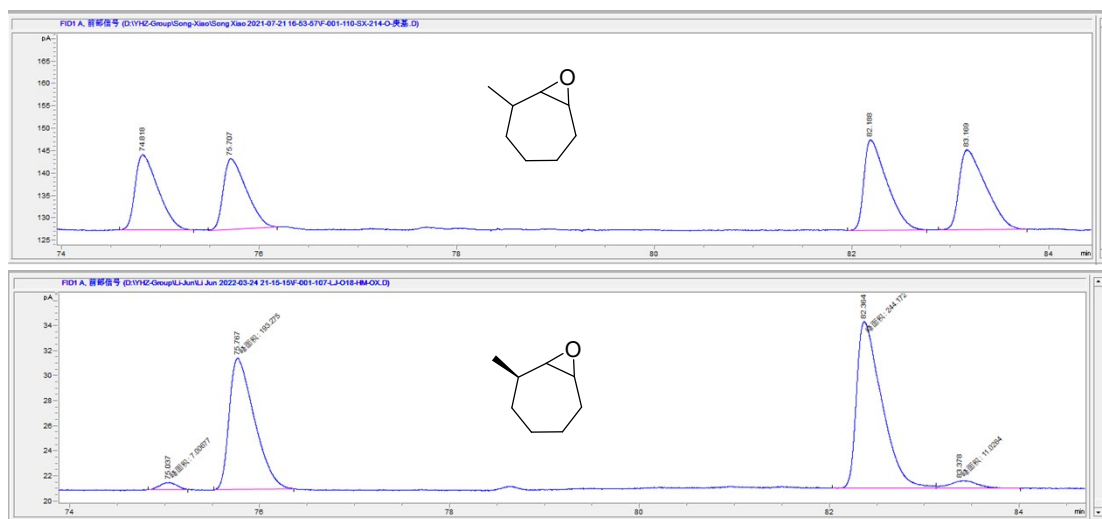

| Peak # | RetTime [min] | Type | Width [min] | Area [pA*s] | Height [pA] | Area %   |
|--------|---------------|------|-------------|-------------|-------------|----------|
| 1      | 75.037        | MM   | 0.2047      | 7.00677     | 5.70579e-1  | 1.53833  |
| 2      | 75.767        | MM   | 0.3069      | 193.27498   | 10.49551    | 42.43321 |
| 3      | 82.364        | MF   | 0.3062      | 244.17232   | 13.29194    | 53.60764 |
| 4      | 83.378        | FM   | 0.3157      | 11.02638    | 5.82189e-1  | 2.42082  |

## (R)-2-(cyclopent-2-en-1-yl)ethylbenzene(5a)

Colorless oil. 56.7 mg, 82% isolated yield, 83% *ee*. The enantiomeric excess was determined by GC on a chiral stationary phase after derivatisation in corresponding epoxides (CP-Chiralsil-Dex-CB column, Method: 80-0-1-120-30-1-150-0-20-200-5, RT: 85.67, 87.06, 92.41, 94.08 min). <sup>1</sup>H NMR (400 MHz, Chloroform-*d*)  $\delta_{\text{H}}$ /ppm 7.30 – 7.25 (m, 2H), 7.22 – 7.13 (m, 3H), 5.77 – 5.67 (m, 2H), 2.72 – 2.58 (m, 3H), 2.42 – 2.22 (m, 2H), 2.15 – 2.01 (m, 1H), 1.80 – 1.69 (m, 1H), 1.66 – 1.57 (m, 1H), 1.51 – 1.40 (m, 1H); <sup>13</sup>C NMR (100 MHz, Chloroform-*d*)  $\delta_{\text{C}}$ /ppm 142.8, 134.9, 130.5, 128.4, 128.3, 125.6, 45.2, 37.9, 34.3, 32.0, 29.8.

$[\alpha]_{\text{D}}^{25} = -82.1$  ( $c = 0.13$  in  $\text{CHCl}_3$ )

HRMS (ESI) calcd for  $\text{C}_{13}\text{H}_{17}^+$  [(M+H)<sup>+</sup>] 173.1325, found 173.1321.

### GC traces

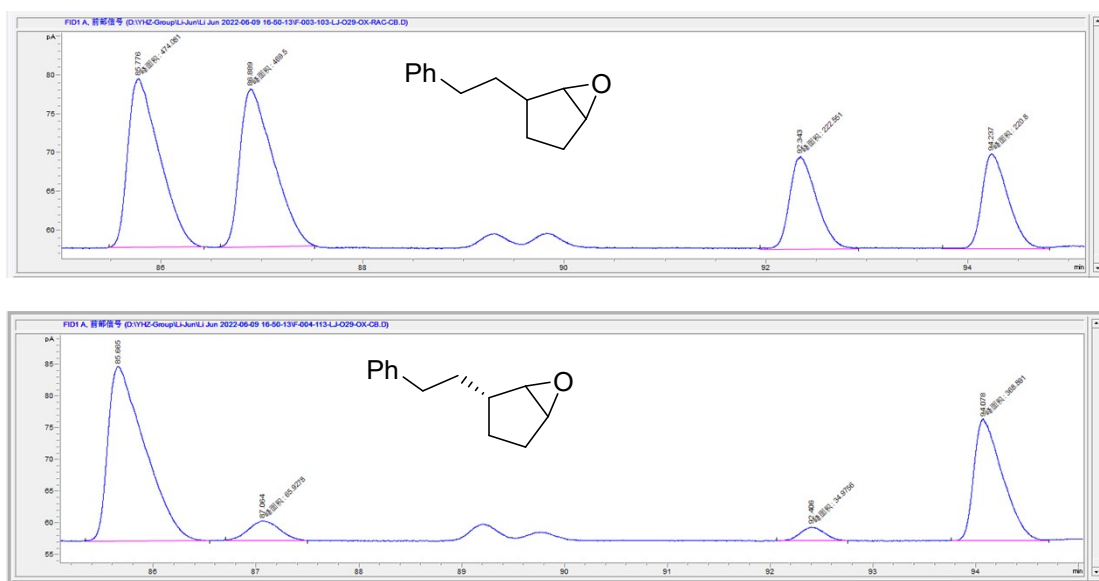

| Peak # | RetTime [min] | Type | Width [min] | Area [pA*s] | Height [pA] | Area %   |
|--------|---------------|------|-------------|-------------|-------------|----------|
| 1      | 85.665        | BB   | 0.2943      | 687.93622   | 27.49742    | 59.42108 |
| 2      | 87.064        | MM   | 0.3536      | 65.92777    | 3.10786     | 5.69457  |
| 3      | 92.406        | MM   | 0.2712      | 34.97562    | 2.14926     | 3.02105  |
| 4      | 94.078        | MM   | 0.3213      | 368.89133   | 19.13802    | 31.86330 |

**<sup>1</sup>H NMR spectrum of 3a in CDCl<sub>3</sub>**

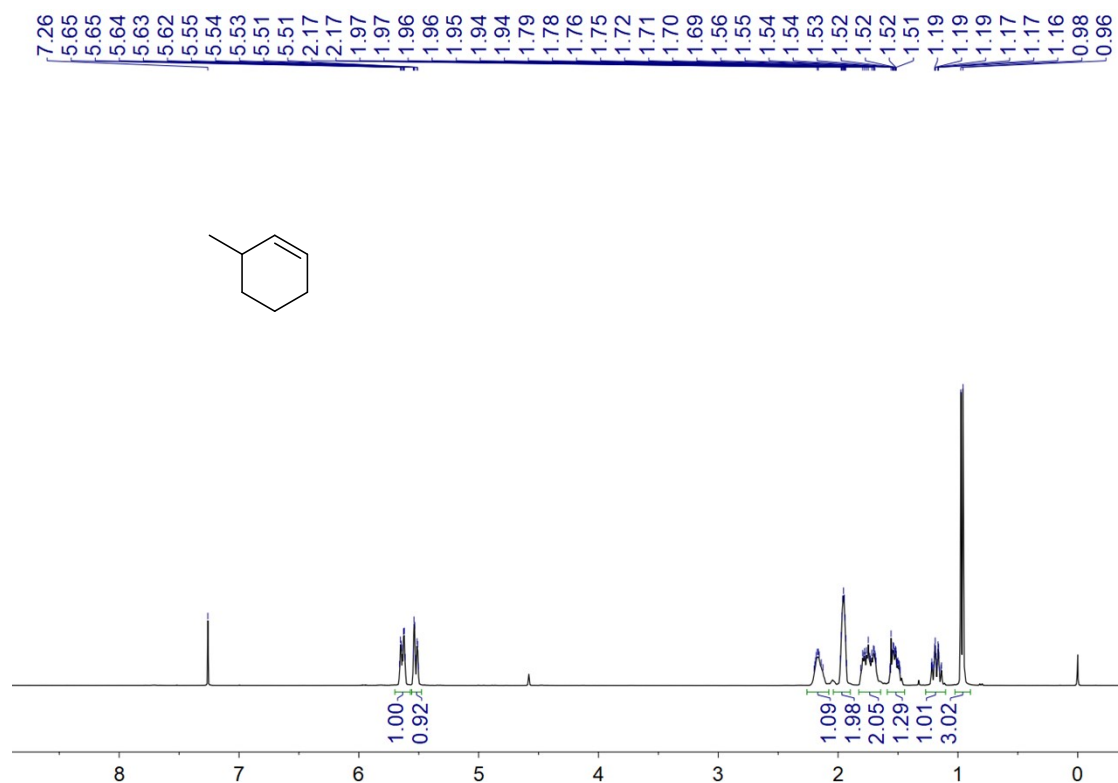

**<sup>13</sup>C NMR spectrum of 3b in CDCl<sub>3</sub>**

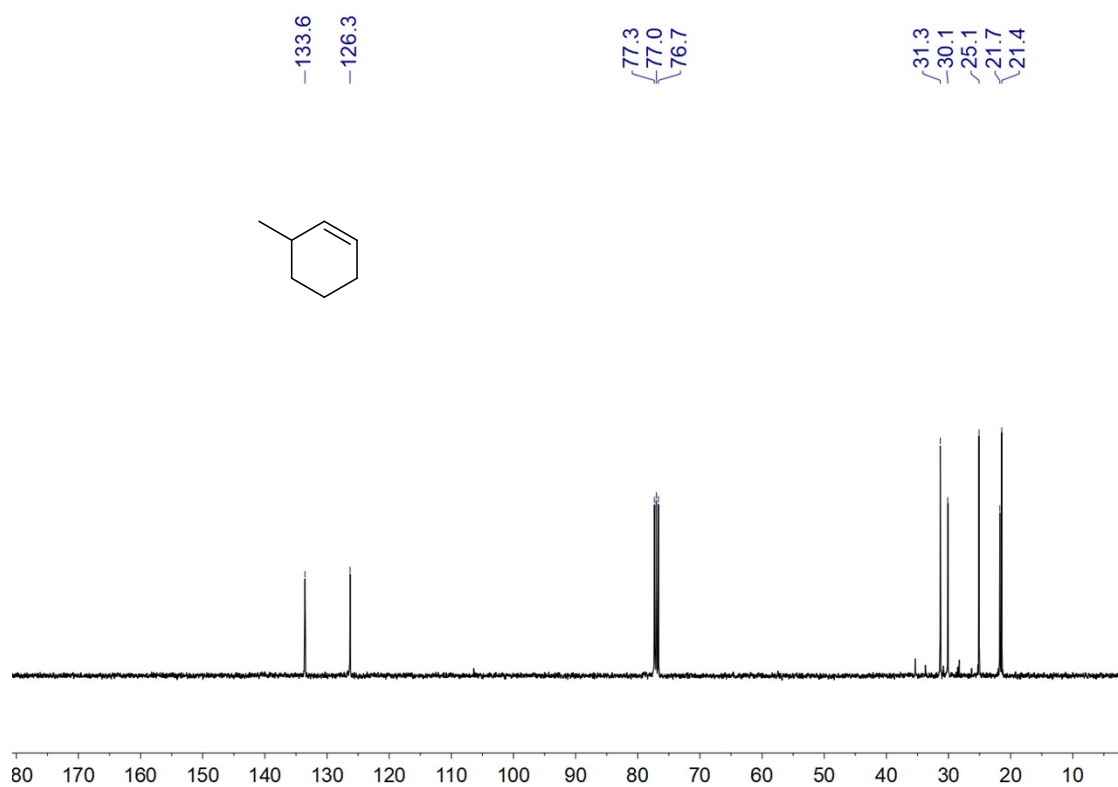

<sup>1</sup>H NMR spectrum of **3b** in CDCl<sub>3</sub>

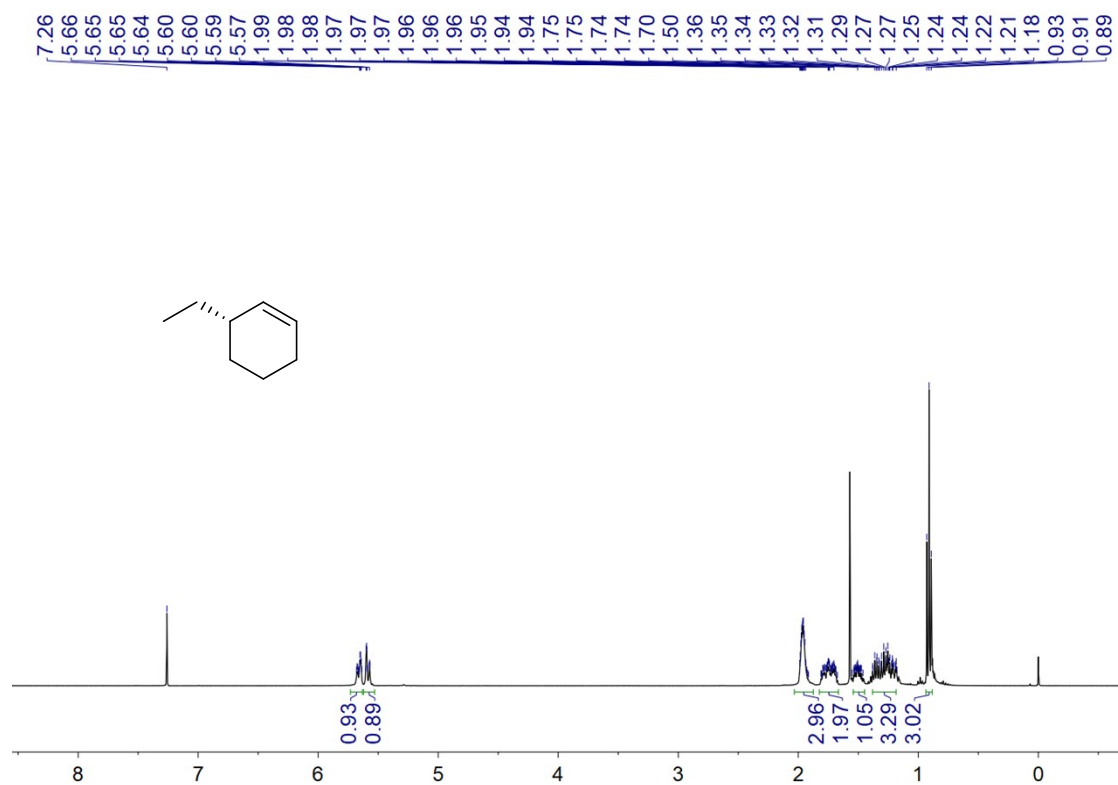

<sup>13</sup>C NMR spectrum of **3b** in CDCl<sub>3</sub>

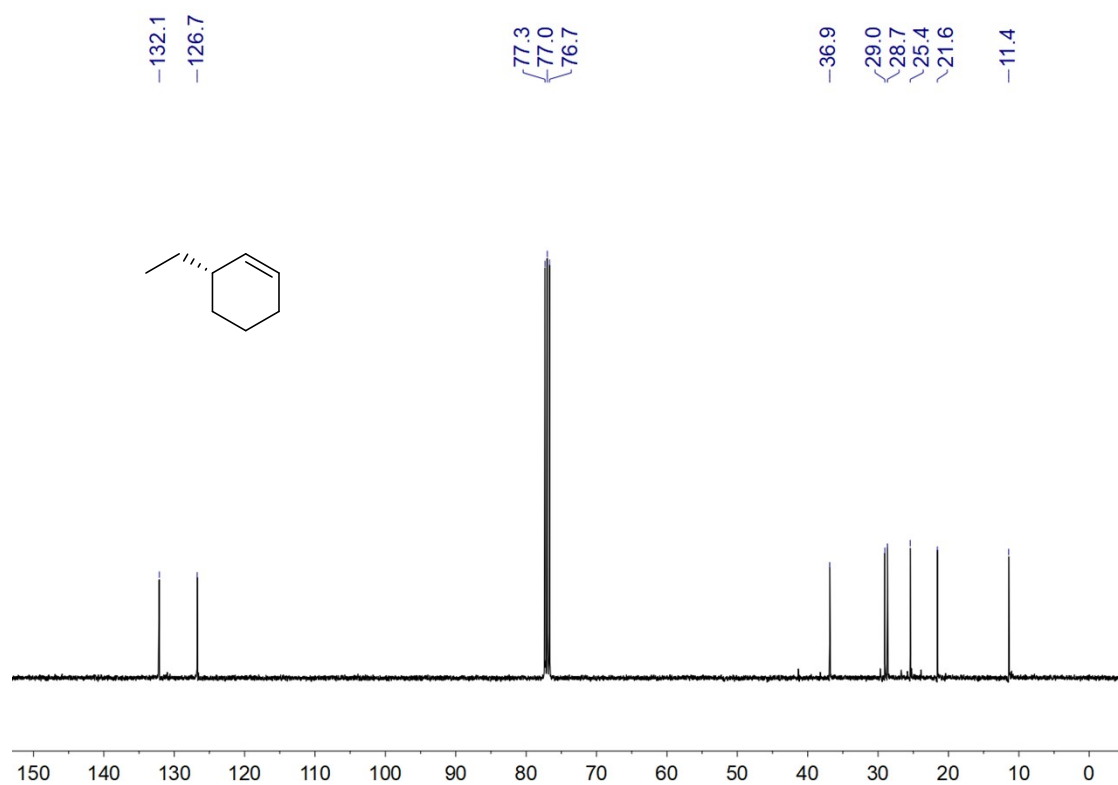

**<sup>1</sup>H NMR spectrum of 3c in CDCl<sub>3</sub>**

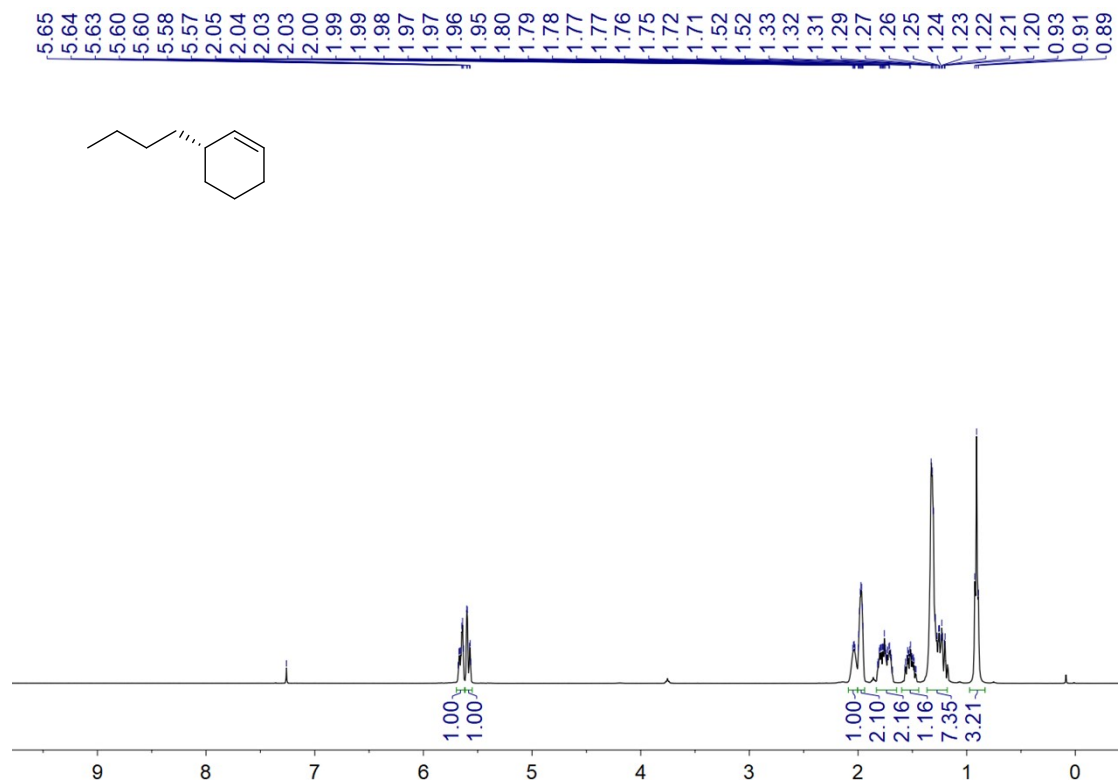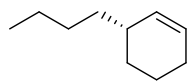

**<sup>13</sup>C NMR spectrum of 3c in CDCl<sub>3</sub>**

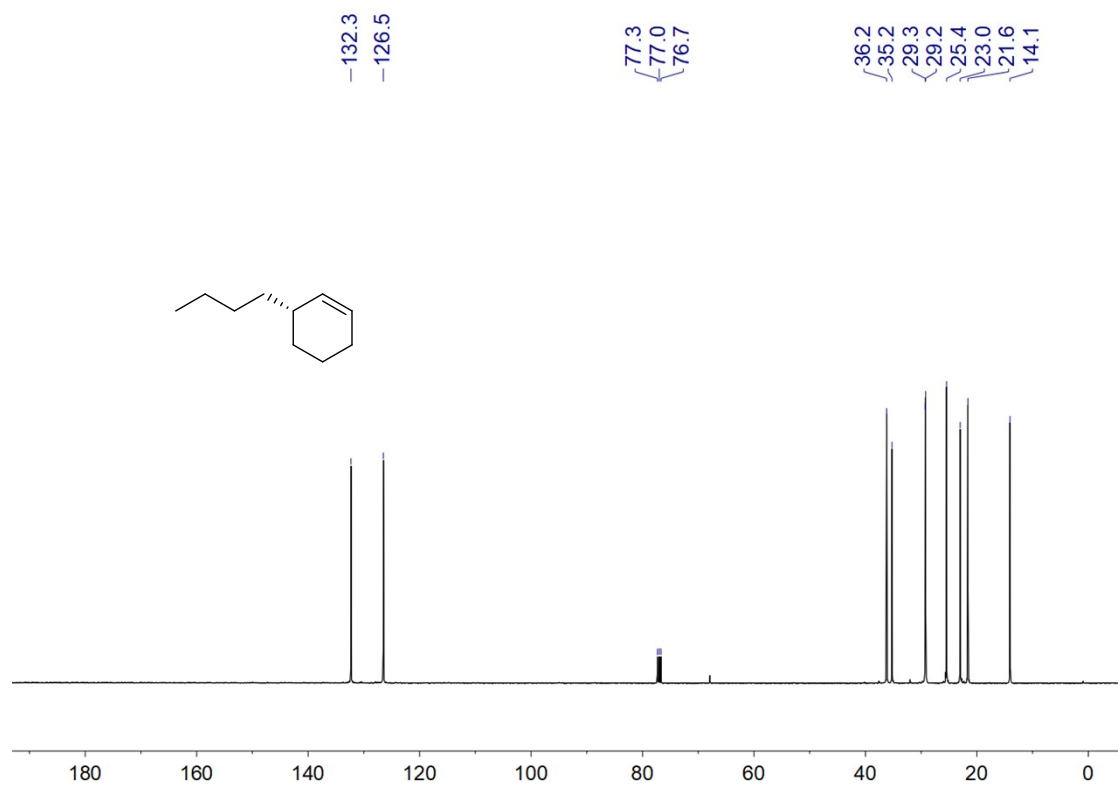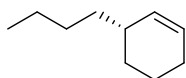

**<sup>1</sup>H NMR spectrum of 3d in CDCl<sub>3</sub>**

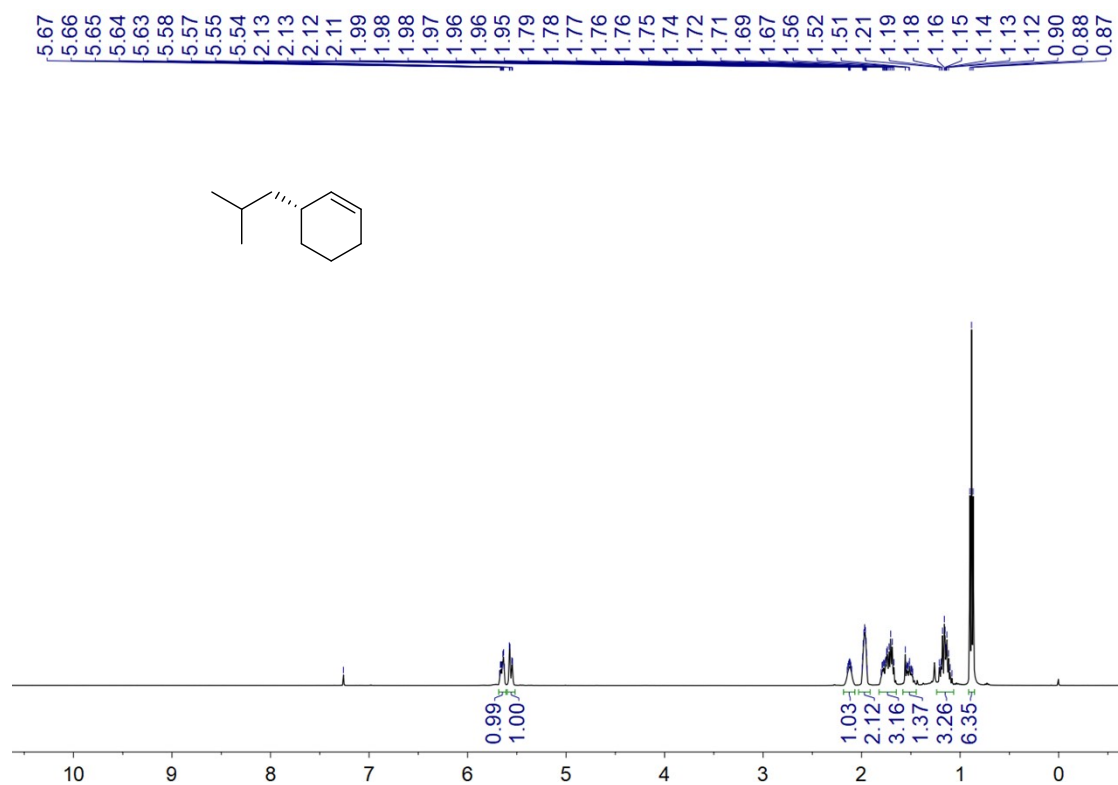

$^{13}\text{C}$  NMR spectrum of **3d** in  $\text{CDCl}_3$

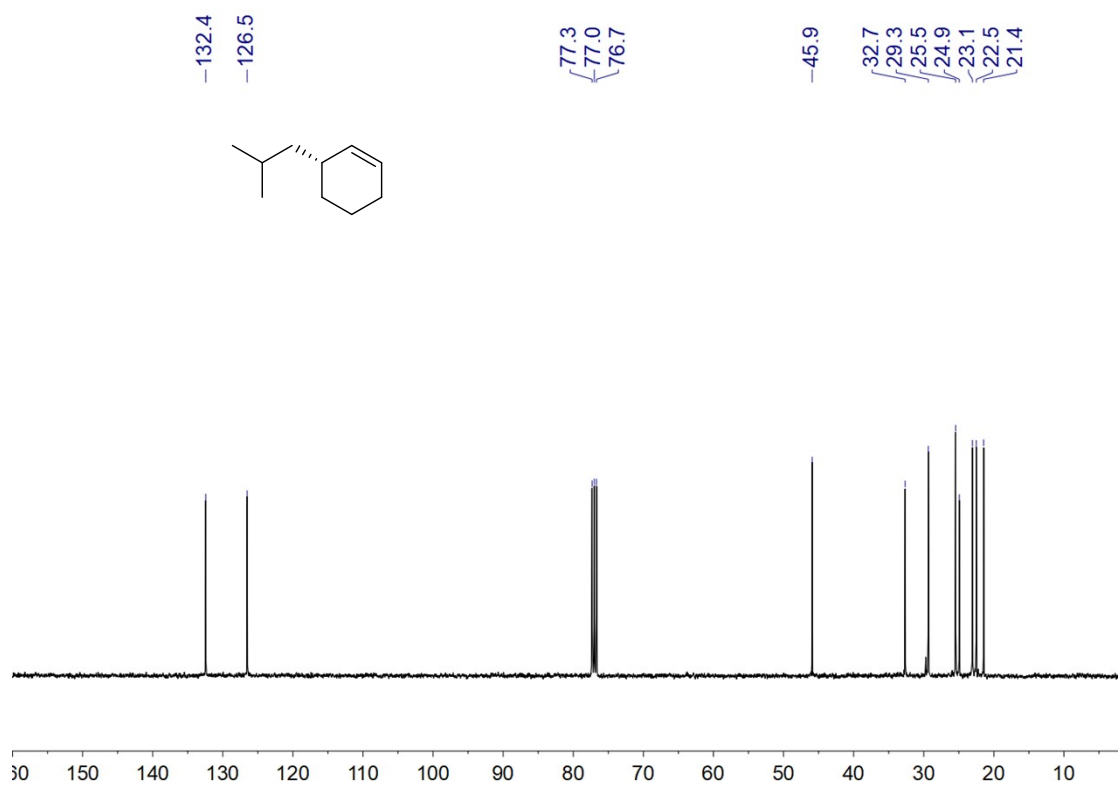



**<sup>1</sup>H NMR spectrum of 3e in CDCl<sub>3</sub>**

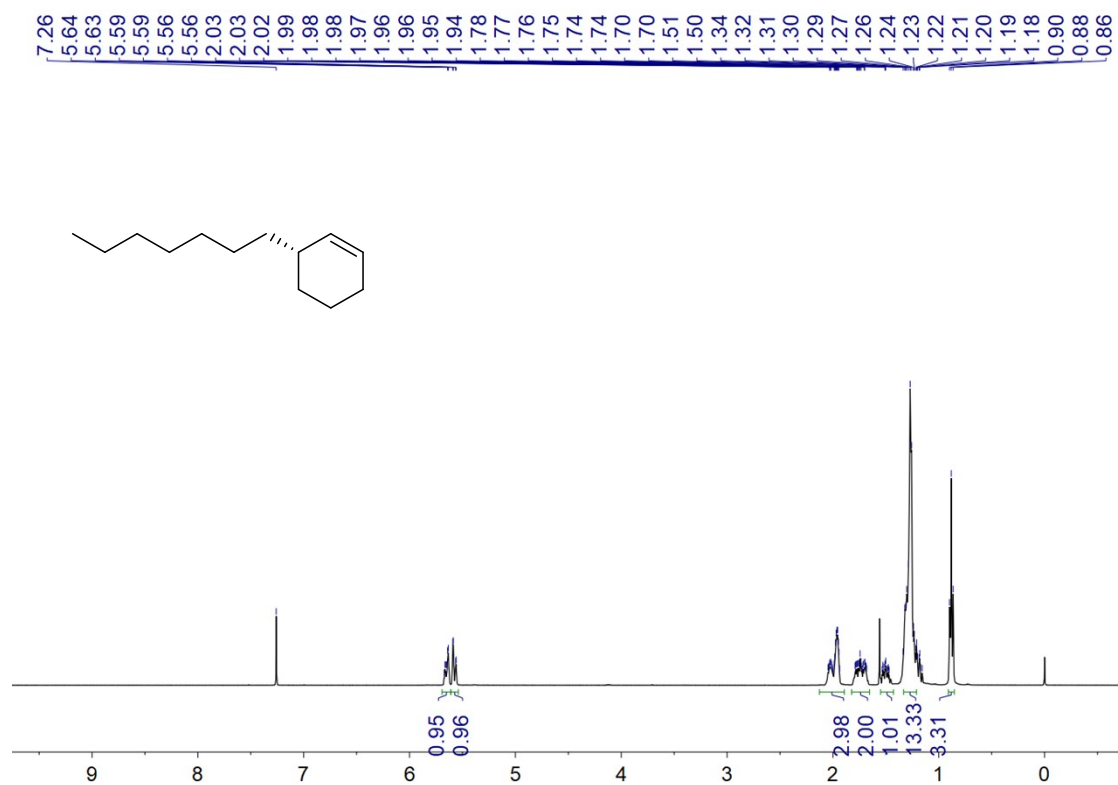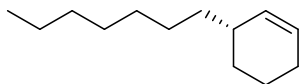

**<sup>13</sup>C NMR spectrum of 3e in CDCl<sub>3</sub>**

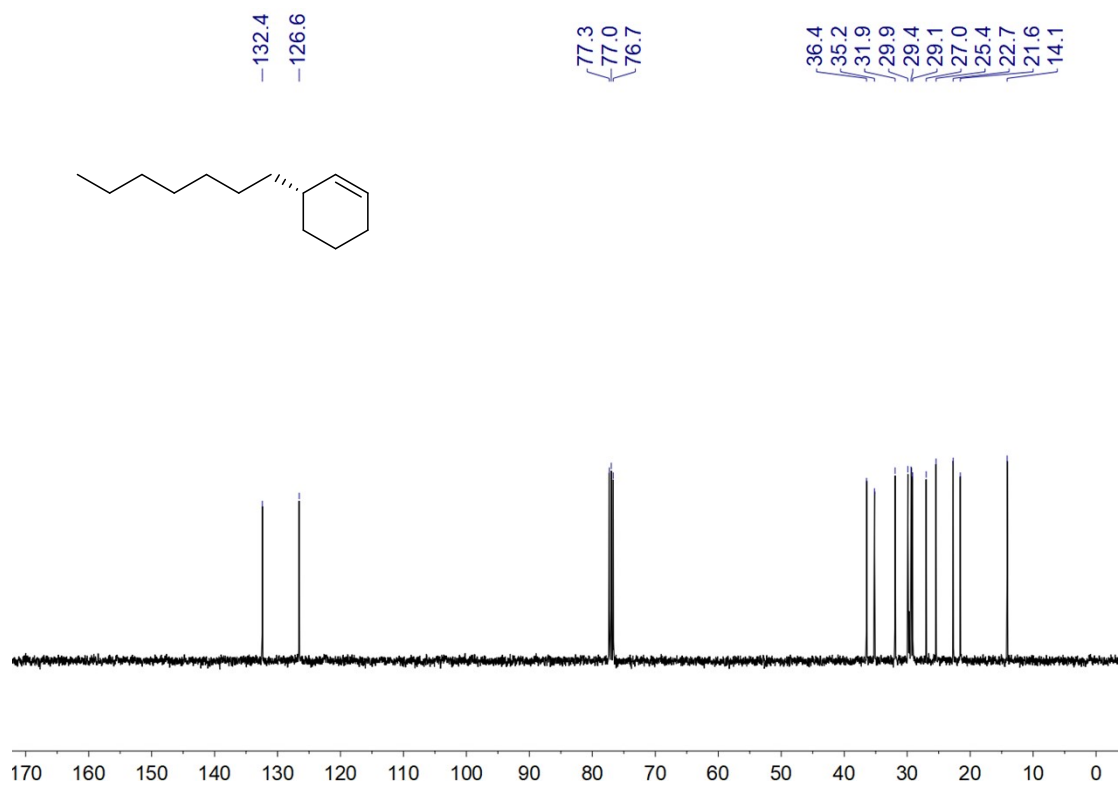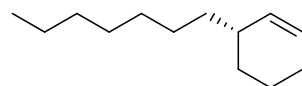

<sup>1</sup>H NMR spectrum of **3f** in CDCl<sub>3</sub>

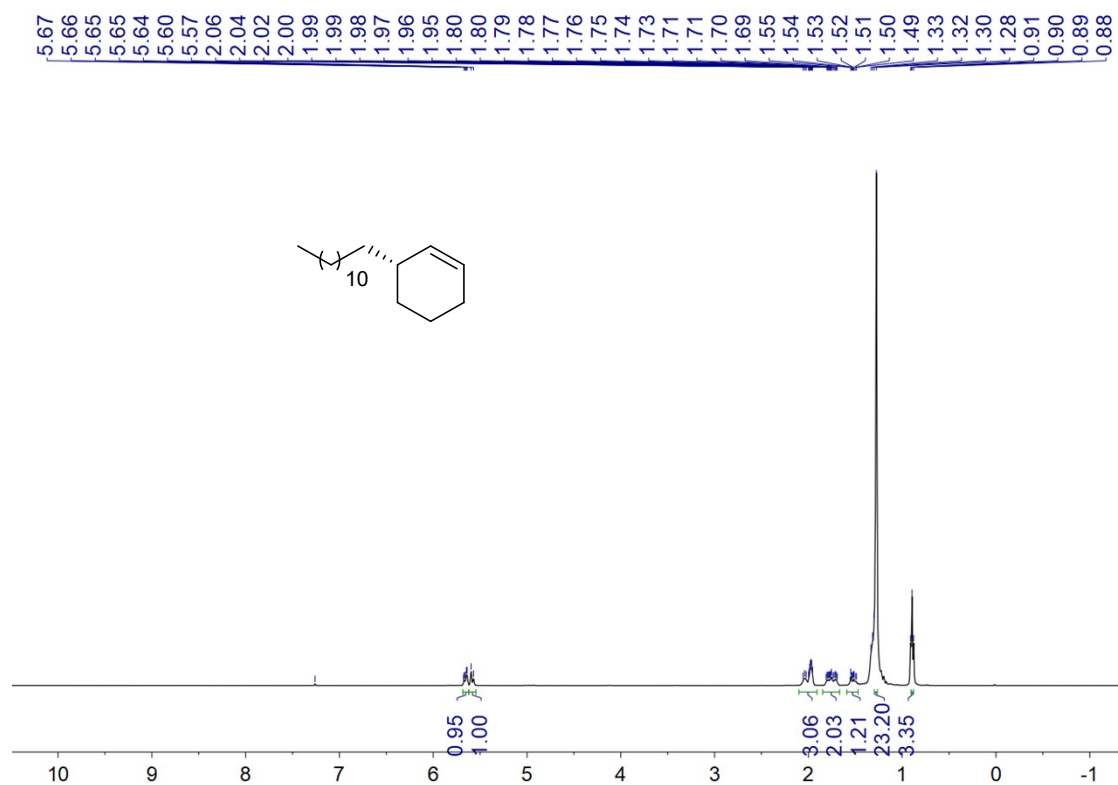

<sup>13</sup>C NMR spectrum of **3f** in CDCl<sub>3</sub>

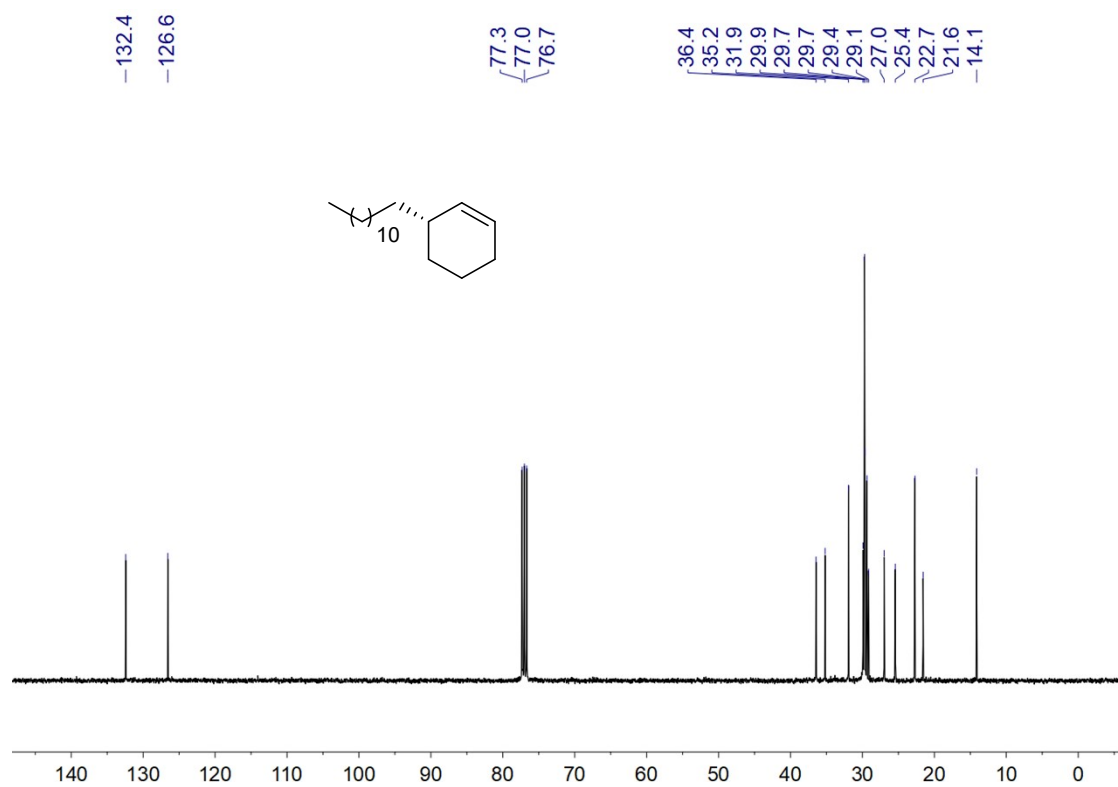

<sup>1</sup>H NMR spectrum of **3g** in CDCl<sub>3</sub>

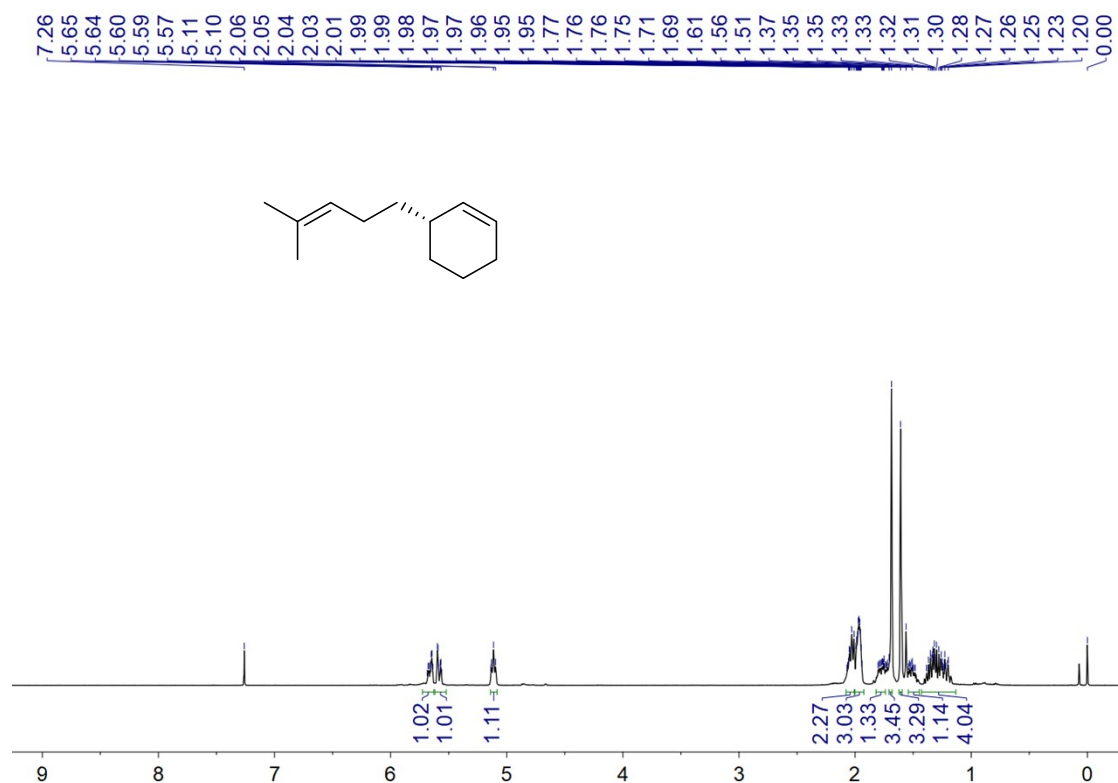

<sup>13</sup>C NMR spectrum of **3g** in CDCl<sub>3</sub>

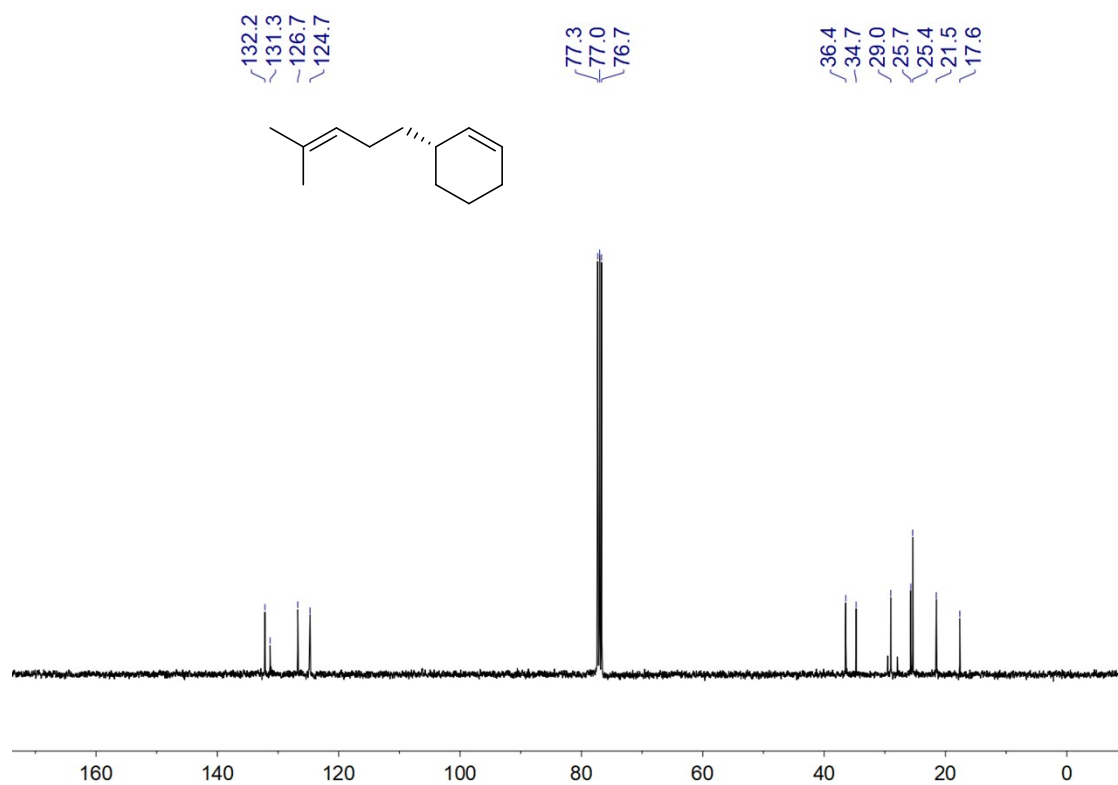

**<sup>1</sup>H NMR spectrum of 3h in CDCl<sub>3</sub>**

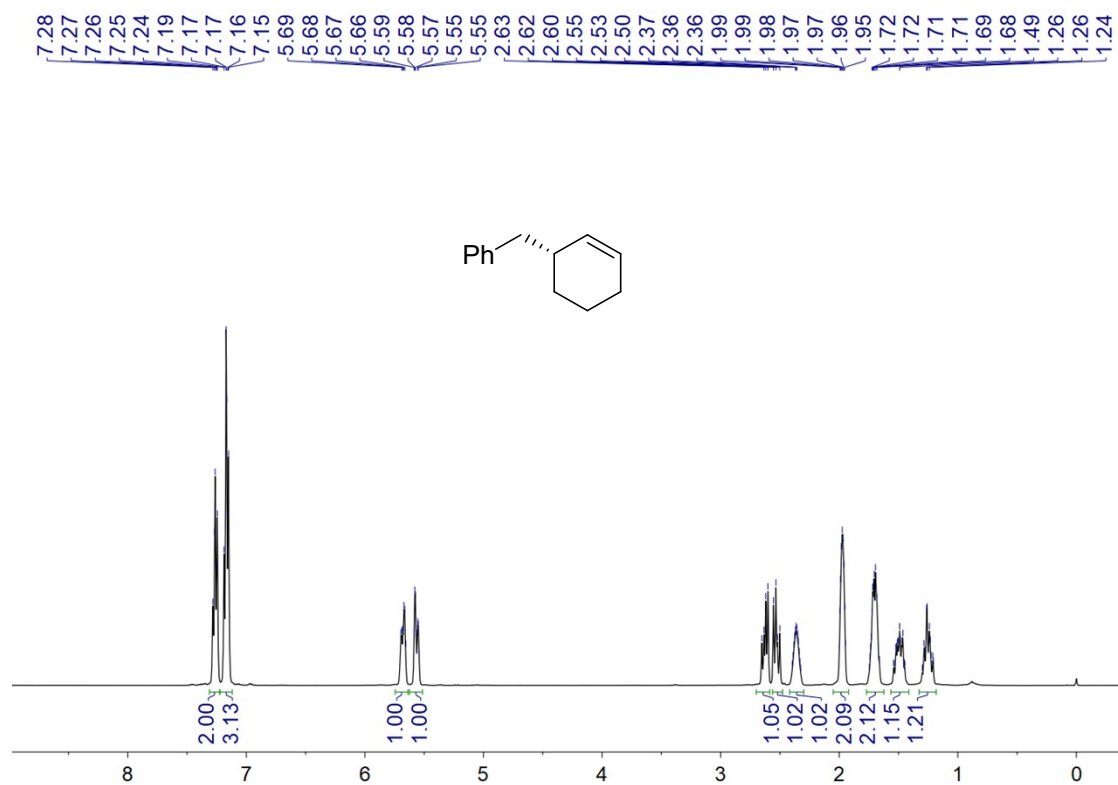

**<sup>13</sup>C NMR spectrum of 3h in CDCl<sub>3</sub>**

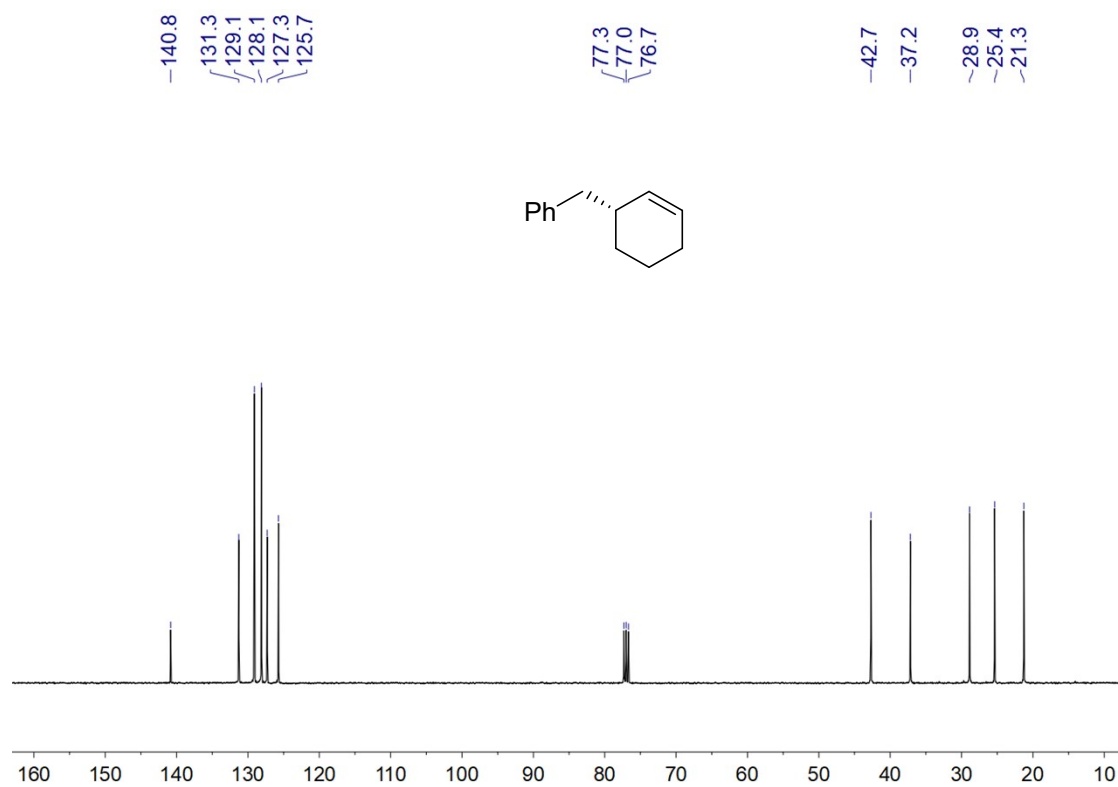

**<sup>1</sup>H NMR spectrum of 3i in CDCl<sub>3</sub>**

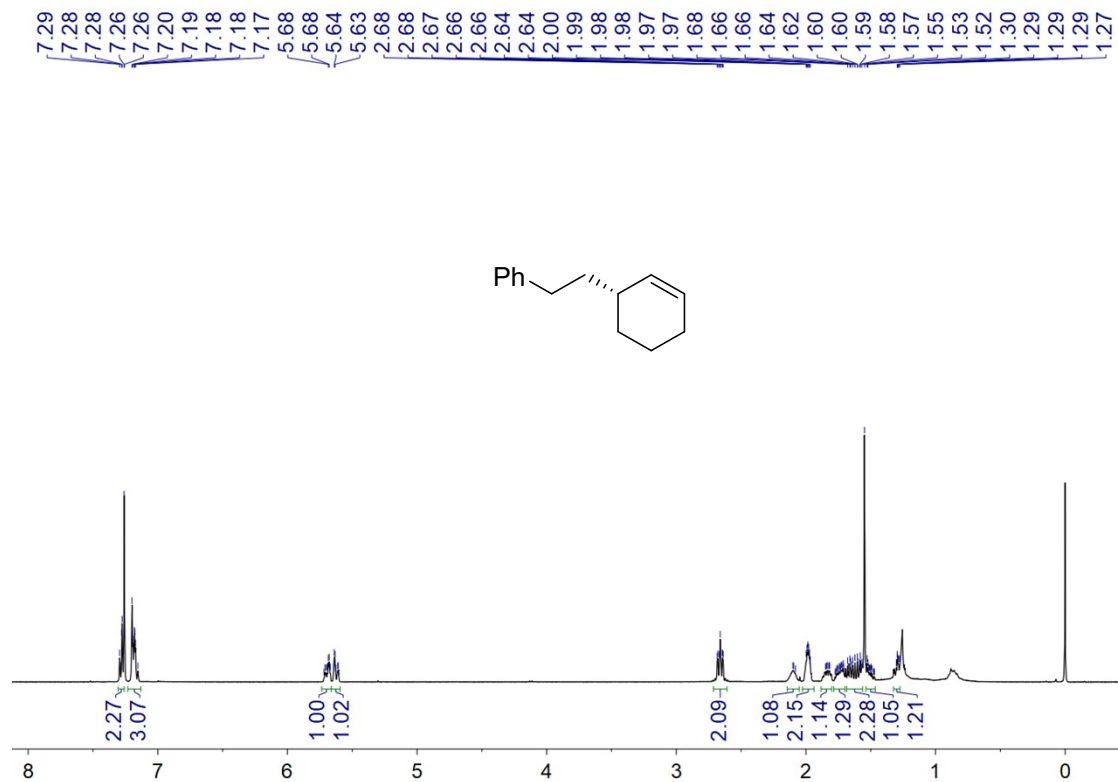

**<sup>13</sup>C NMR spectrum of 3i in CDCl<sub>3</sub>**

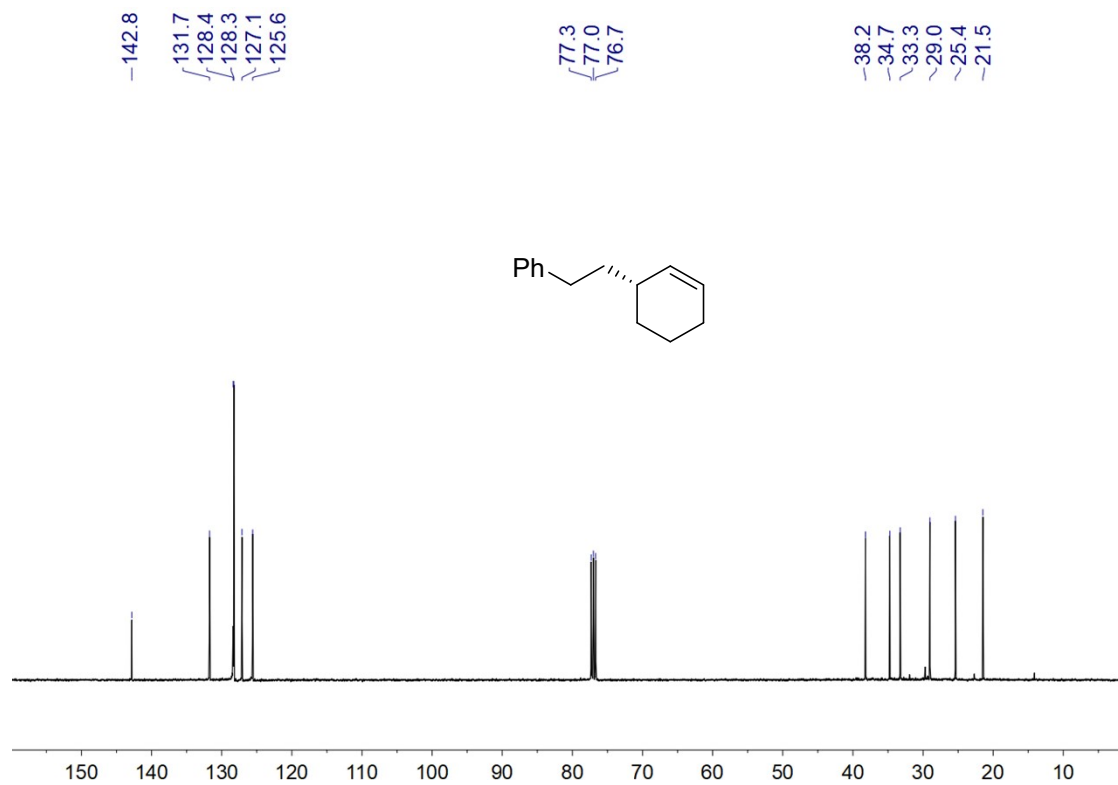

<sup>1</sup>H NMR spectrum of **6j** in CDCl<sub>3</sub>

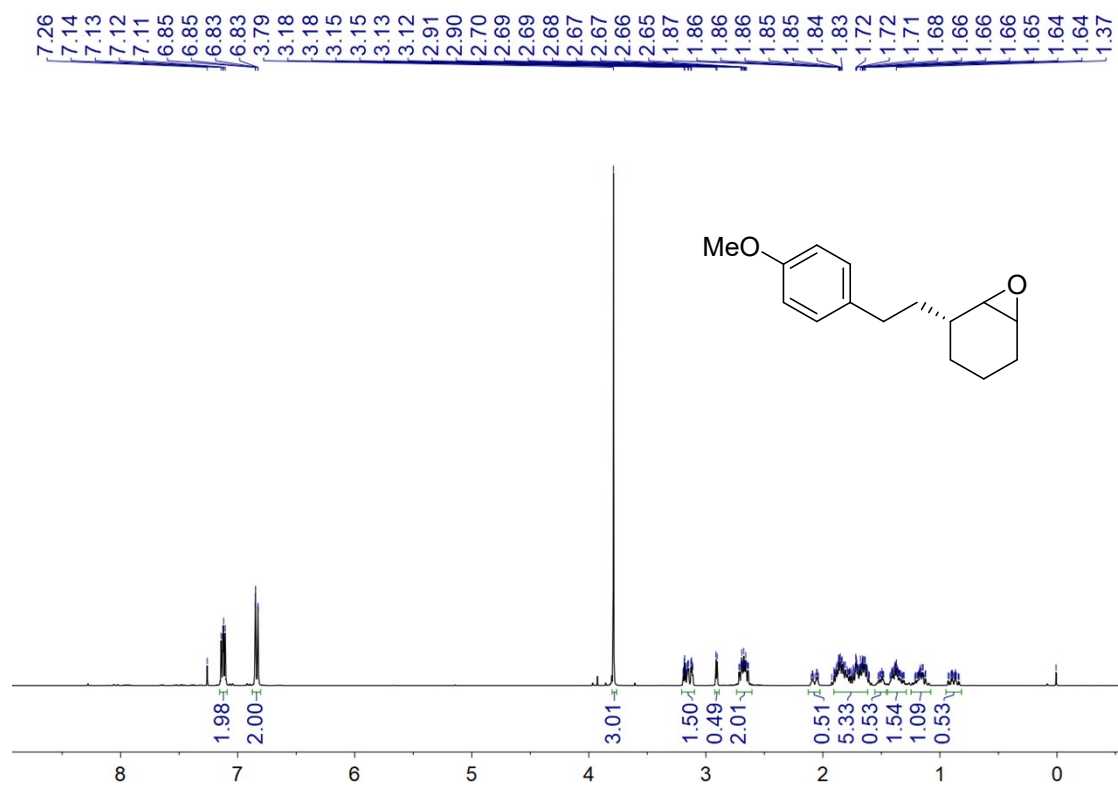

<sup>13</sup>C NMR spectrum of **6j** in CDCl<sub>3</sub>

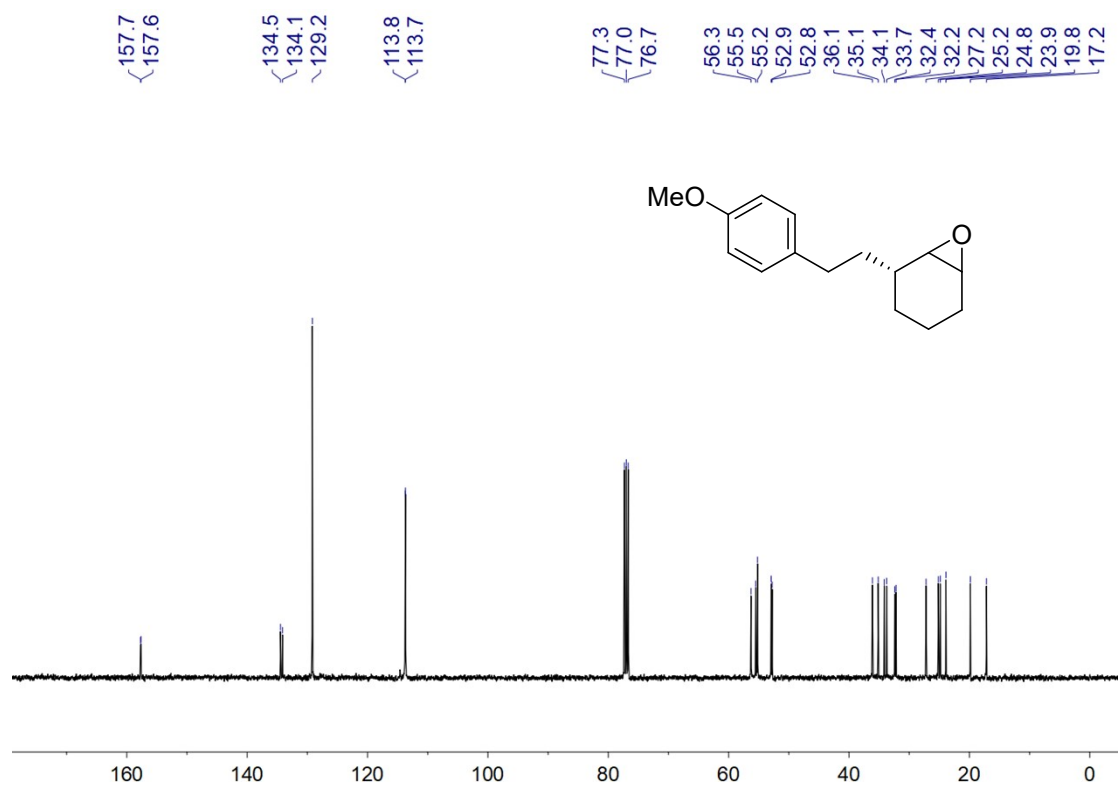

**<sup>1</sup>H NMR spectrum of 3k in CDCl<sub>3</sub>**

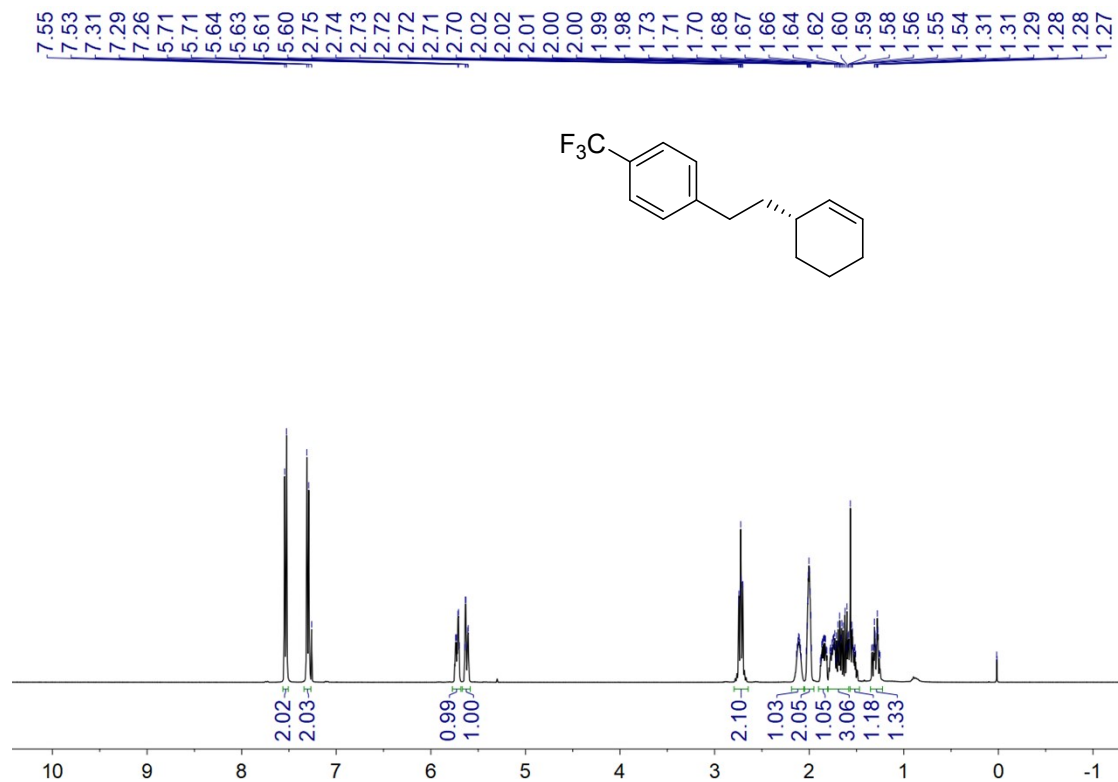

**<sup>13</sup>C NMR spectrum of 3k in CDCl<sub>3</sub>**

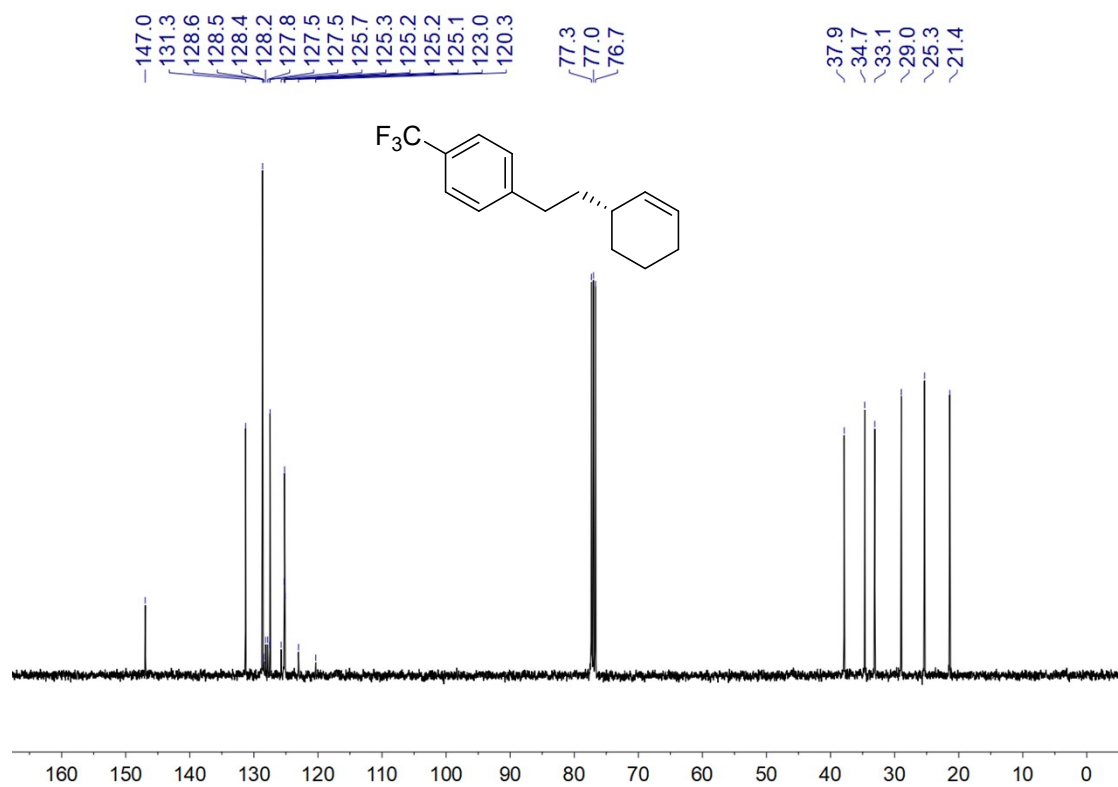

$^{19}\text{F}$  NMR spectrum of **3k** in  $\text{CDCl}_3$

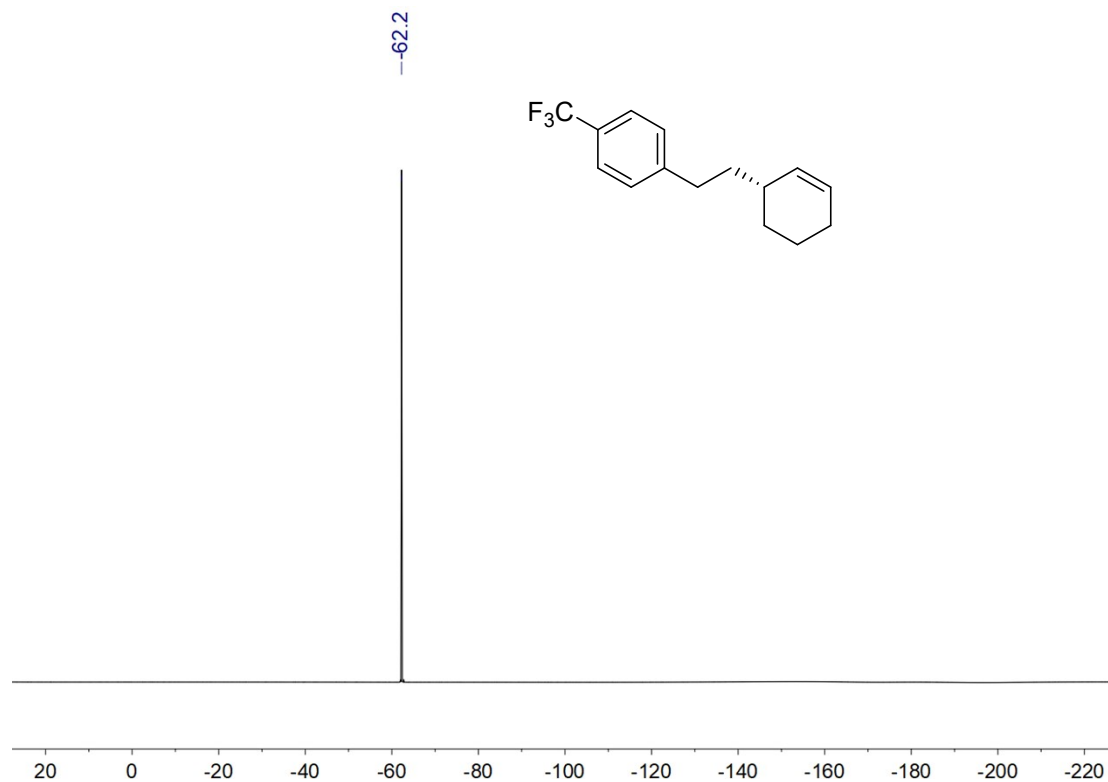

$^1\text{H}$  NMR spectrum of **3l** in  $\text{CDCl}_3$

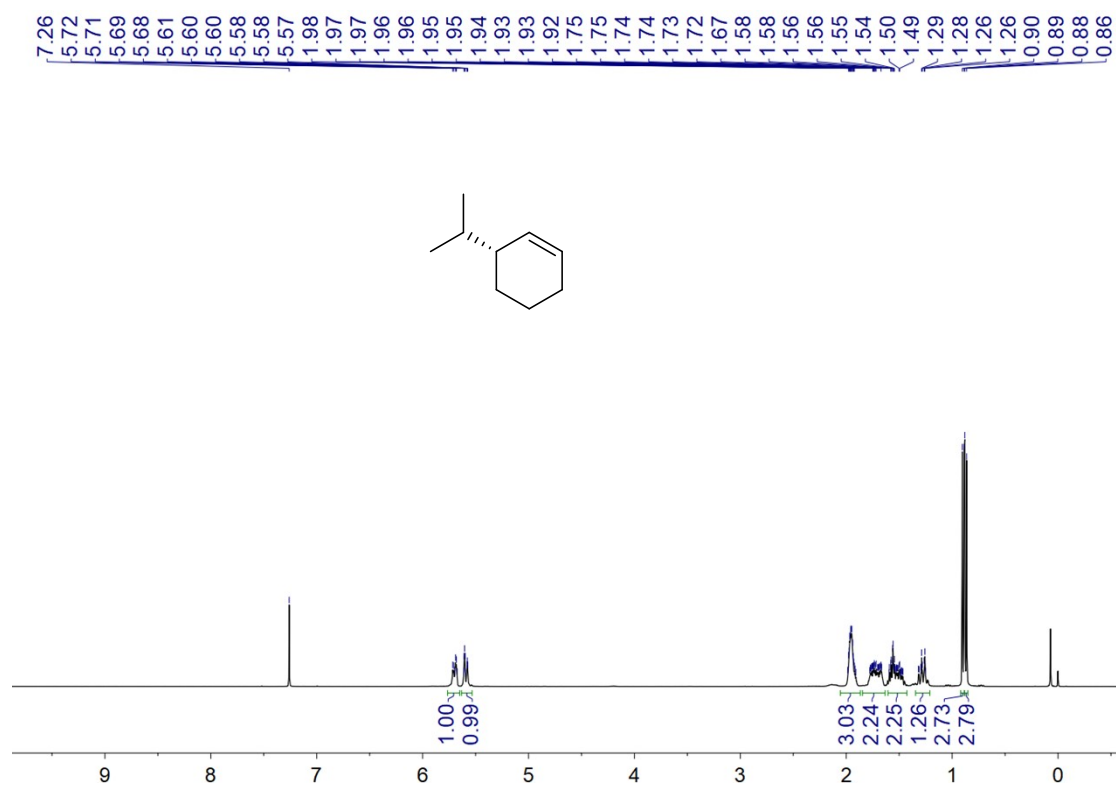



<sup>13</sup>C NMR spectrum of **3l** in CDCl<sub>3</sub>

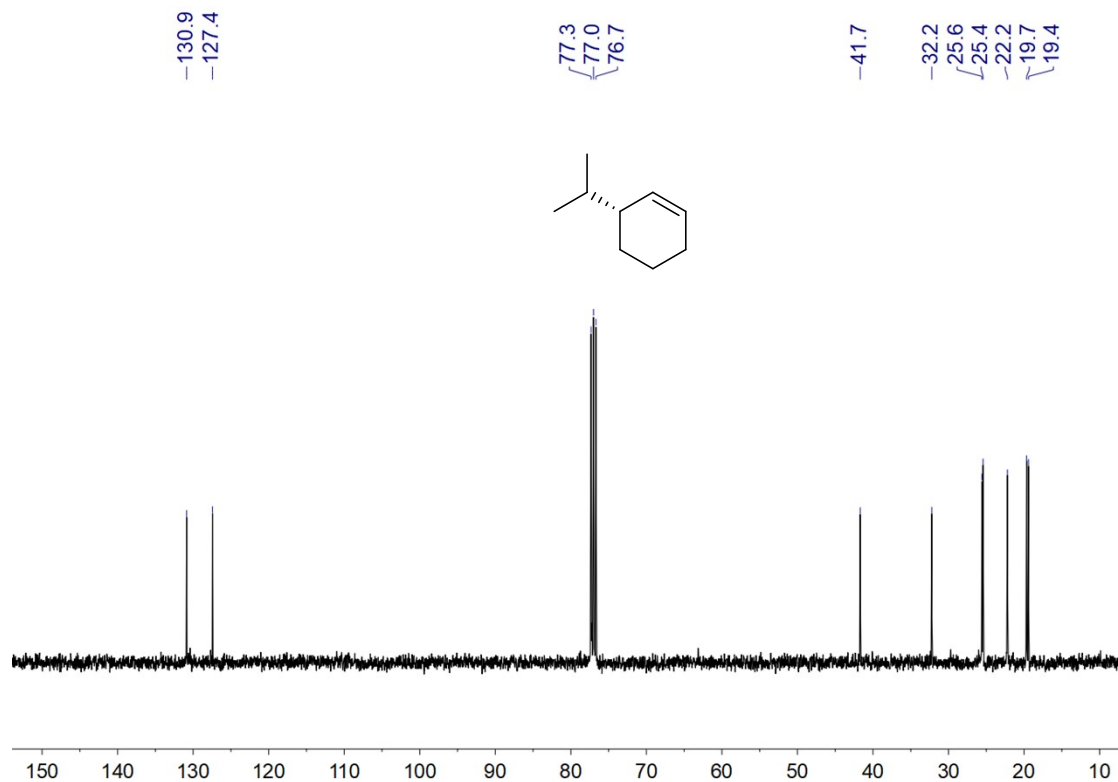

<sup>1</sup>H NMR spectrum of **3m** in CDCl<sub>3</sub>

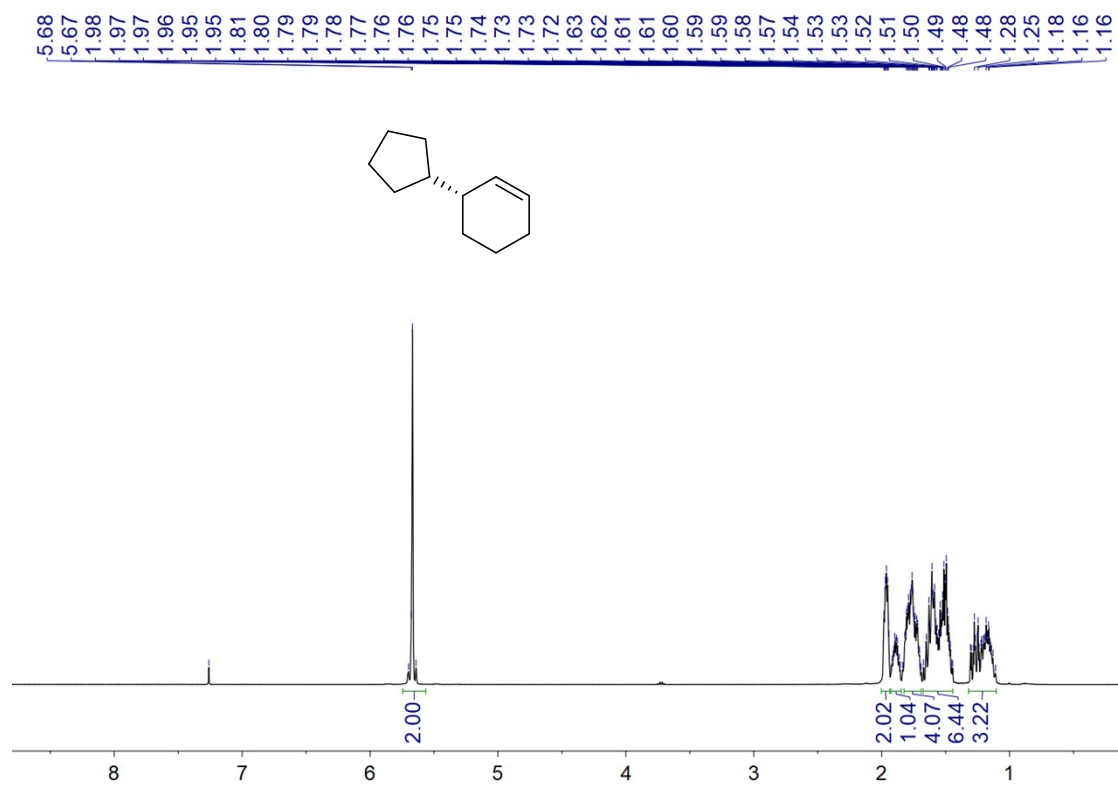

$^{13}\text{C}$  NMR spectrum of **3m** in  $\text{CDCl}_3$

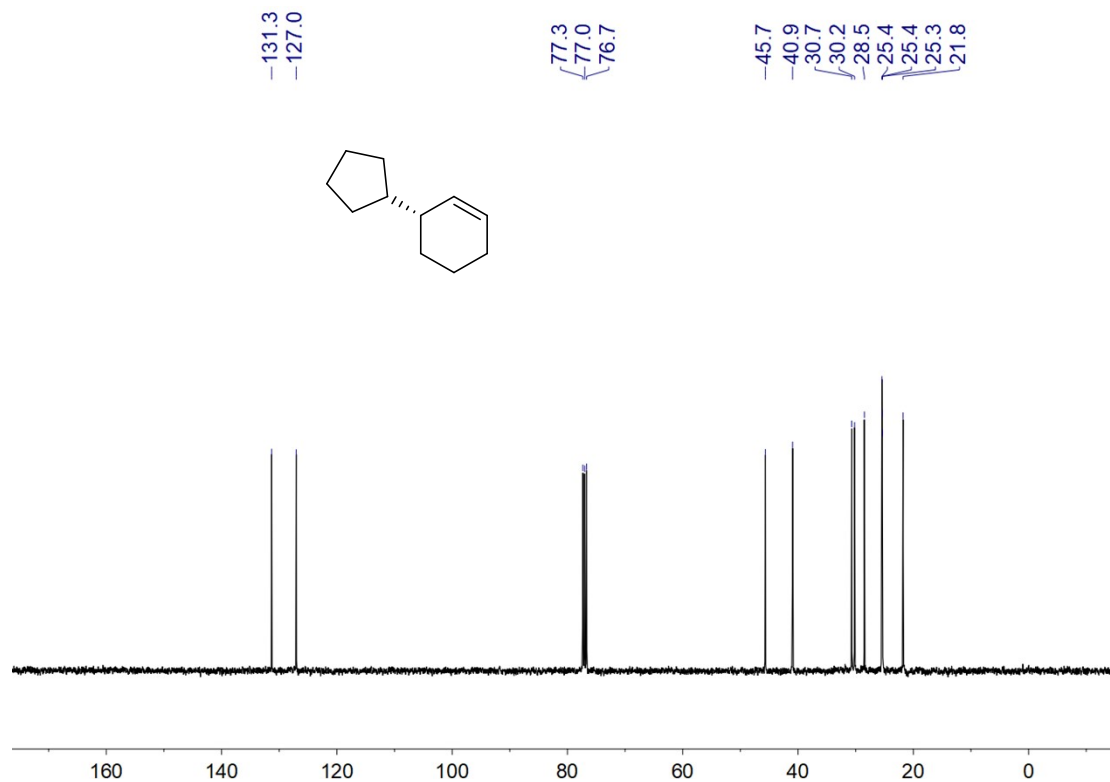

$^1\text{H}$  NMR spectrum of **3n** in  $\text{CDCl}_3$

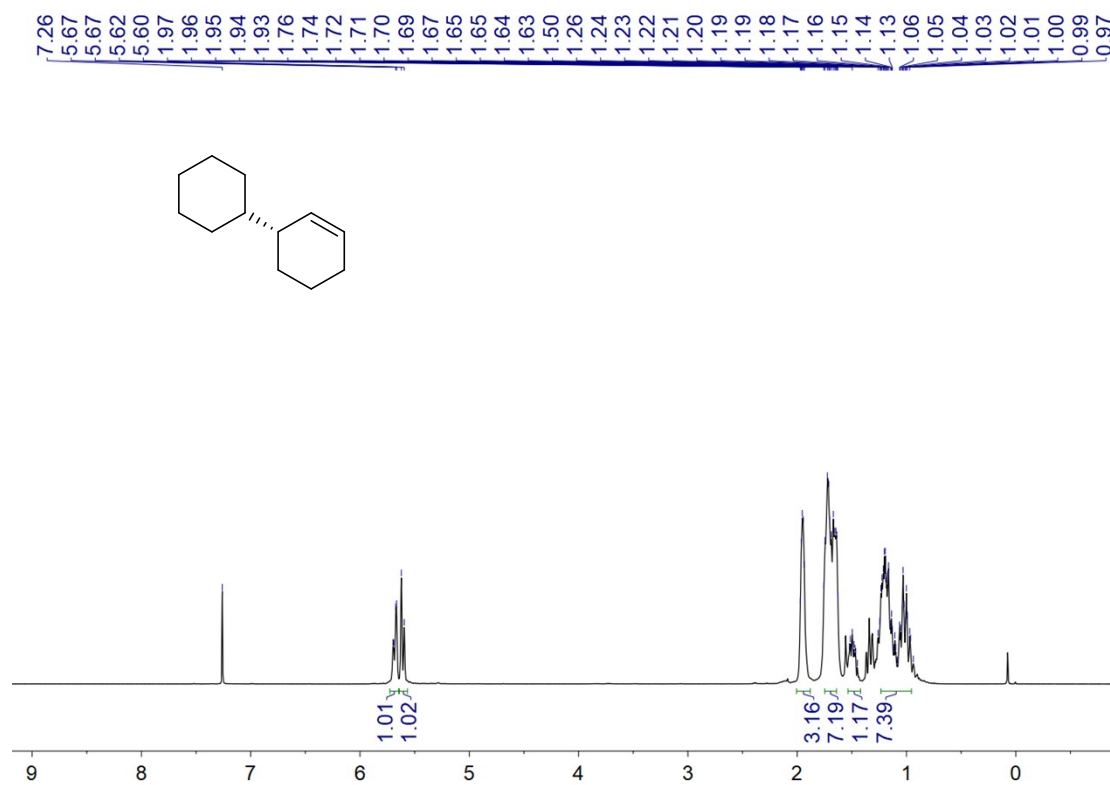

$^{13}\text{C}$  NMR spectrum of **3n** in  $\text{CDCl}_3$

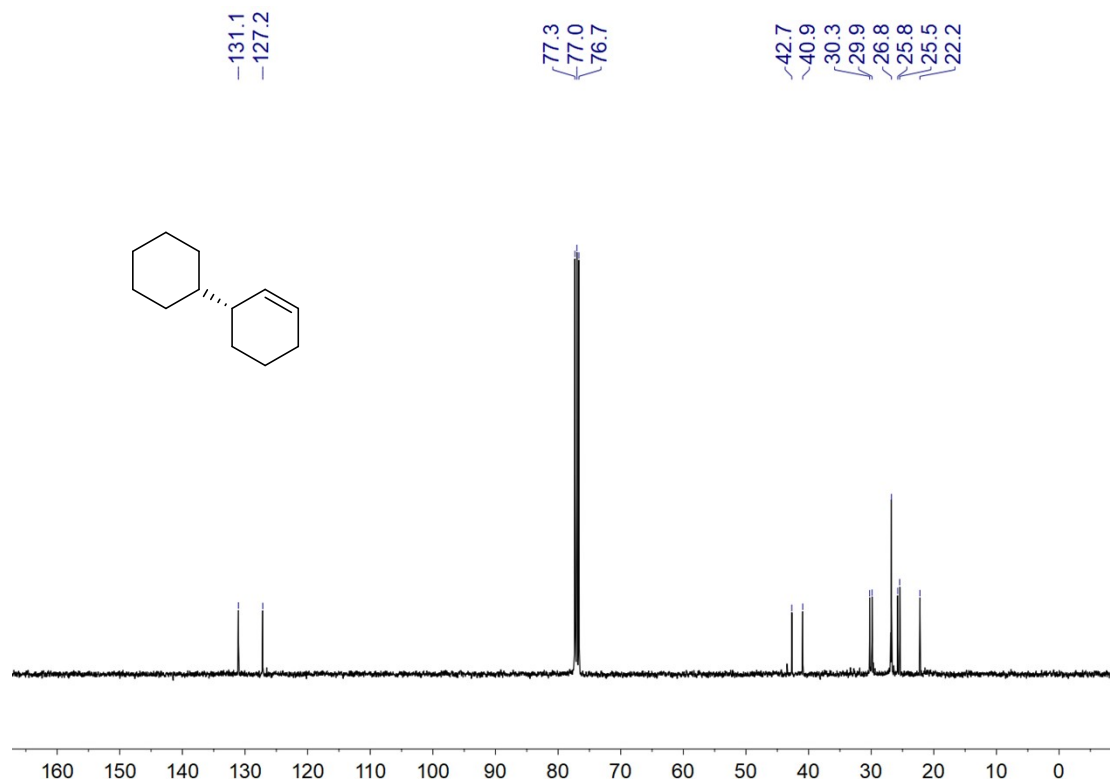

$^1\text{H}$  NMR spectrum of **3o** in  $\text{CDCl}_3$

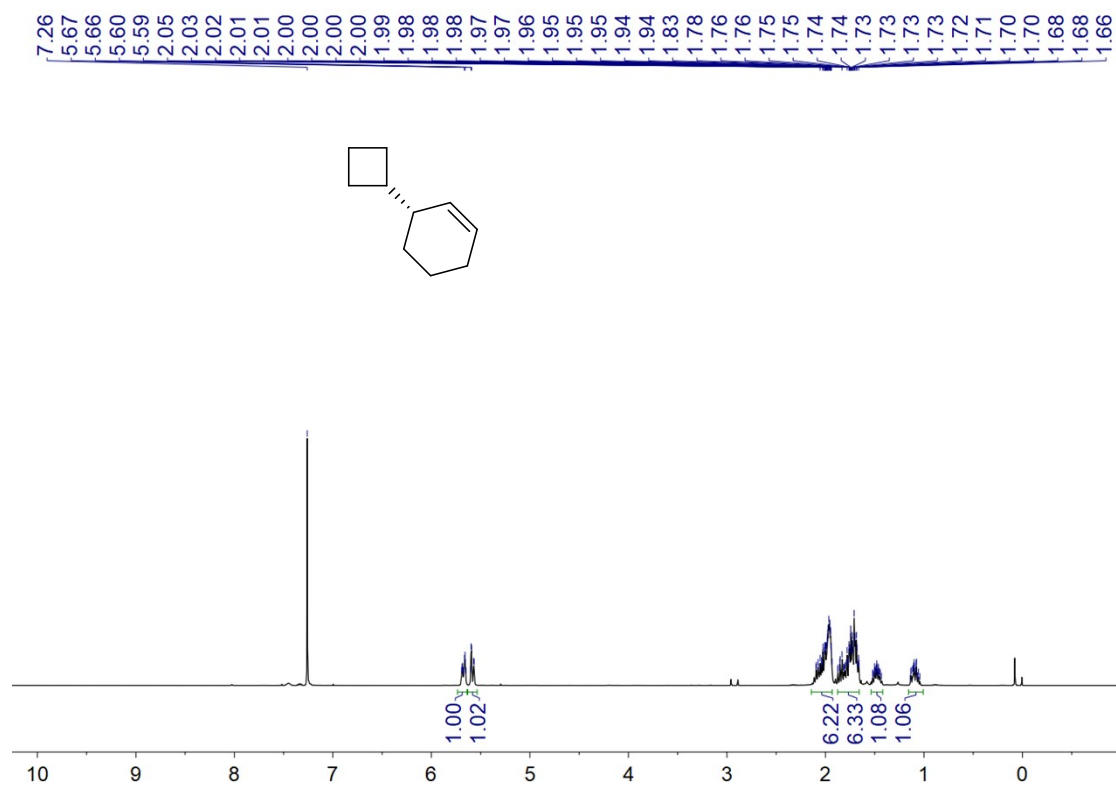

$^{13}\text{C}$  NMR spectrum of **3o** in  $\text{CDCl}_3$

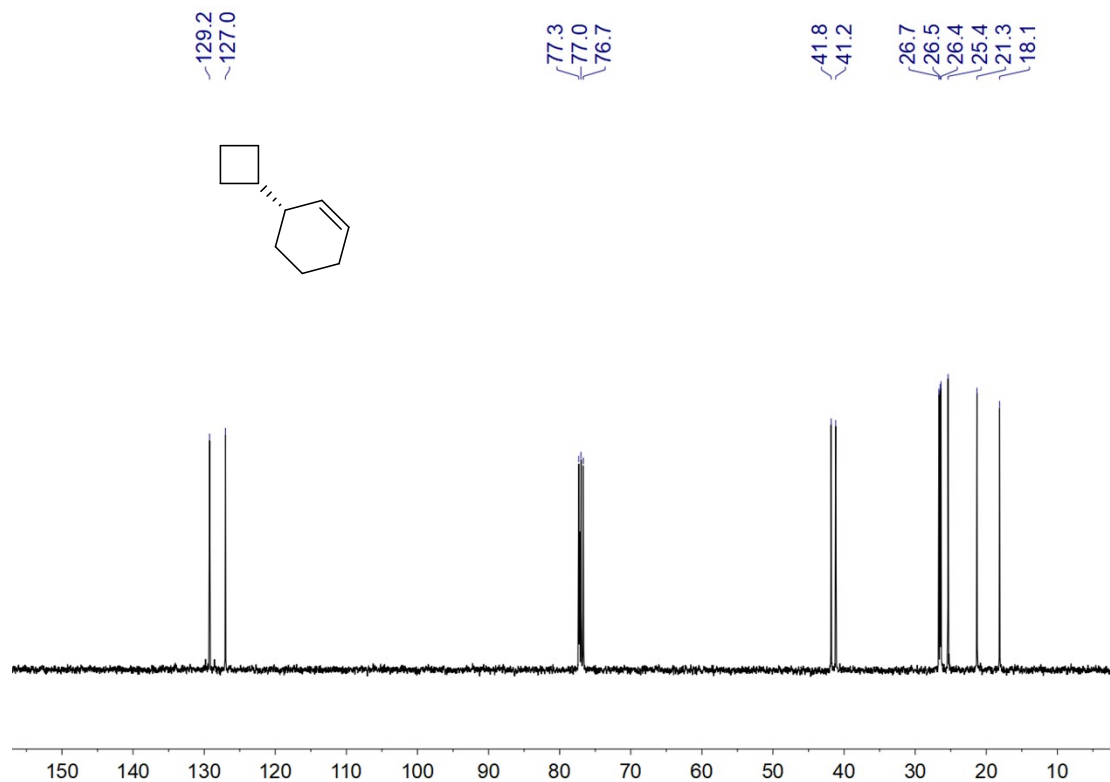

$^1\text{H}$  NMR spectrum of **6p** in  $\text{CDCl}_3$

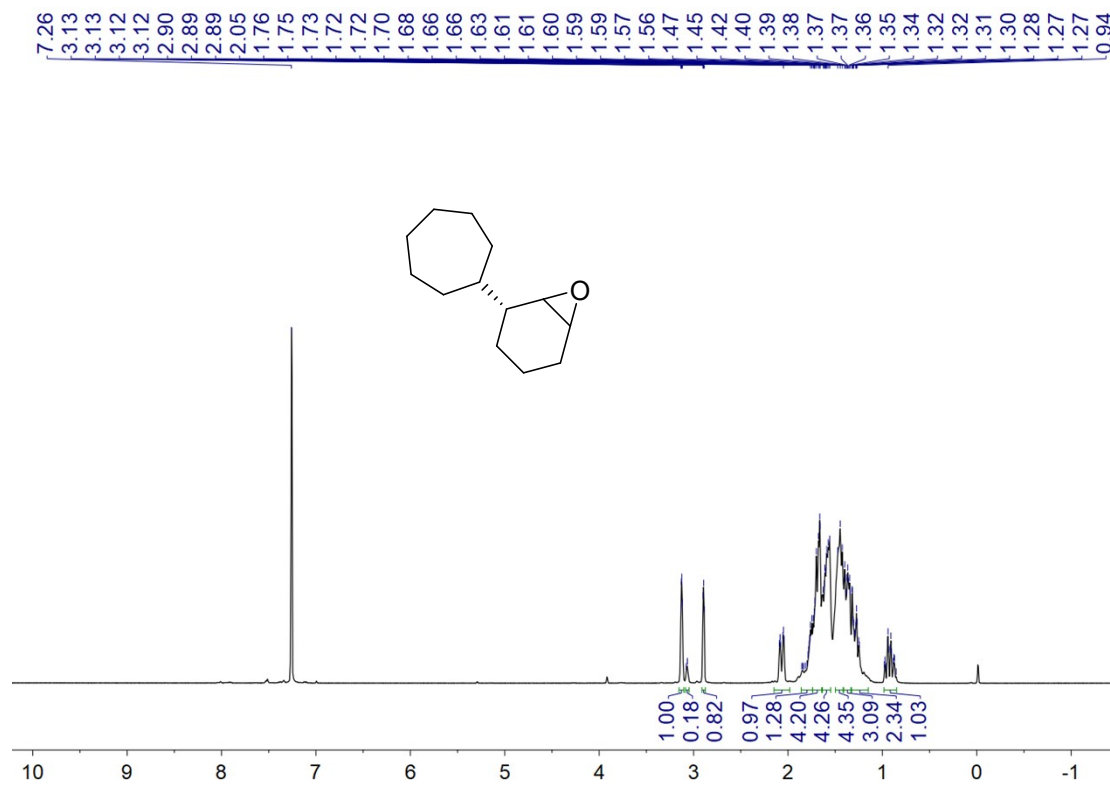

<sup>13</sup>C NMR spectrum of **6p** in CDCl<sub>3</sub>

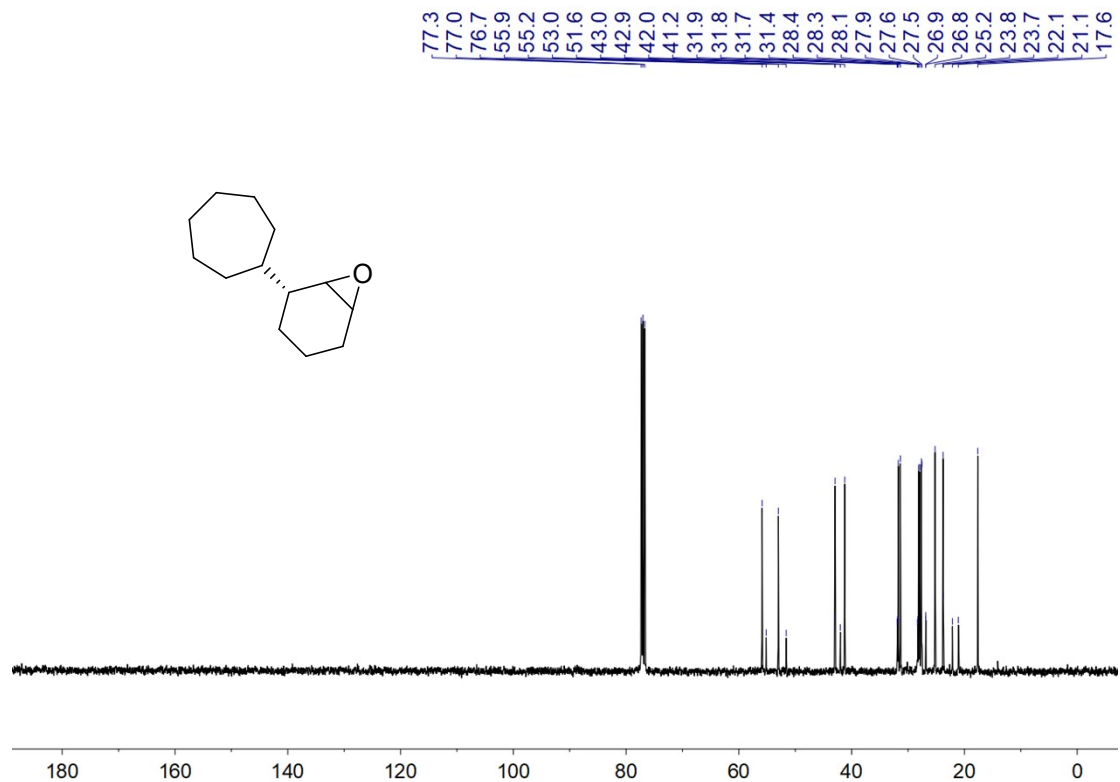

<sup>1</sup>H NMR spectrum of **4a** in CDCl<sub>3</sub>

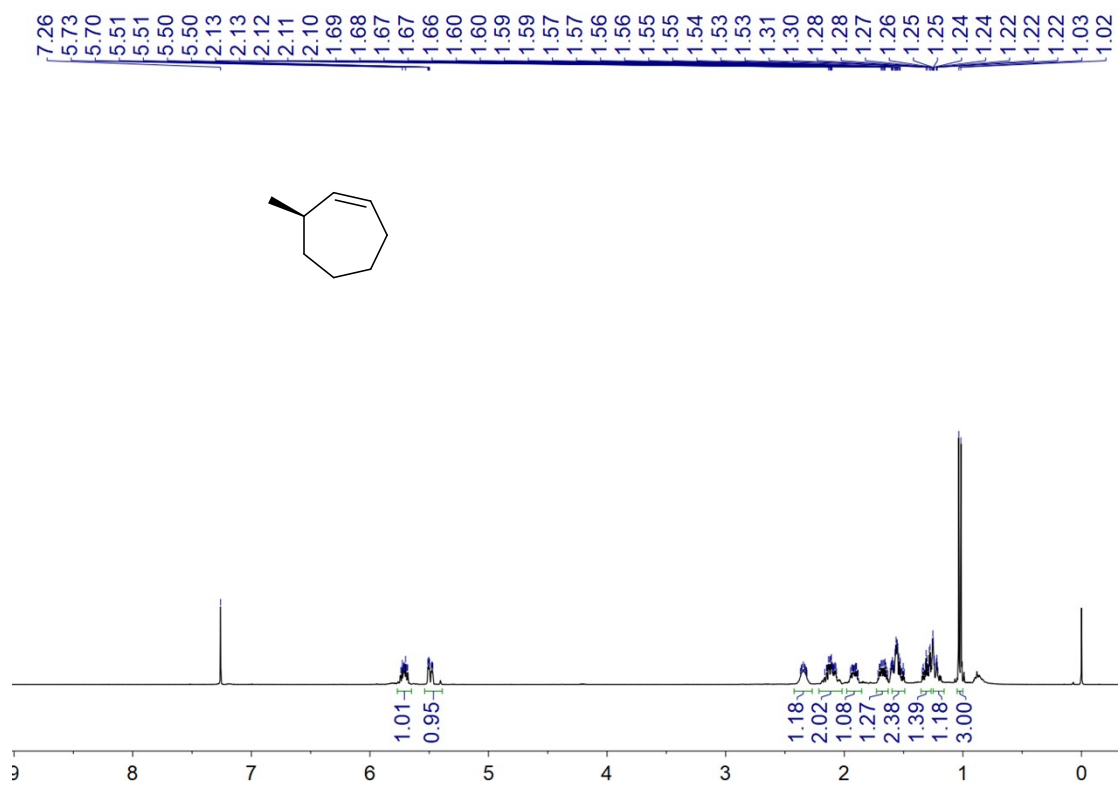

<sup>13</sup>C NMR spectrum of **4a** in CDCl<sub>3</sub>

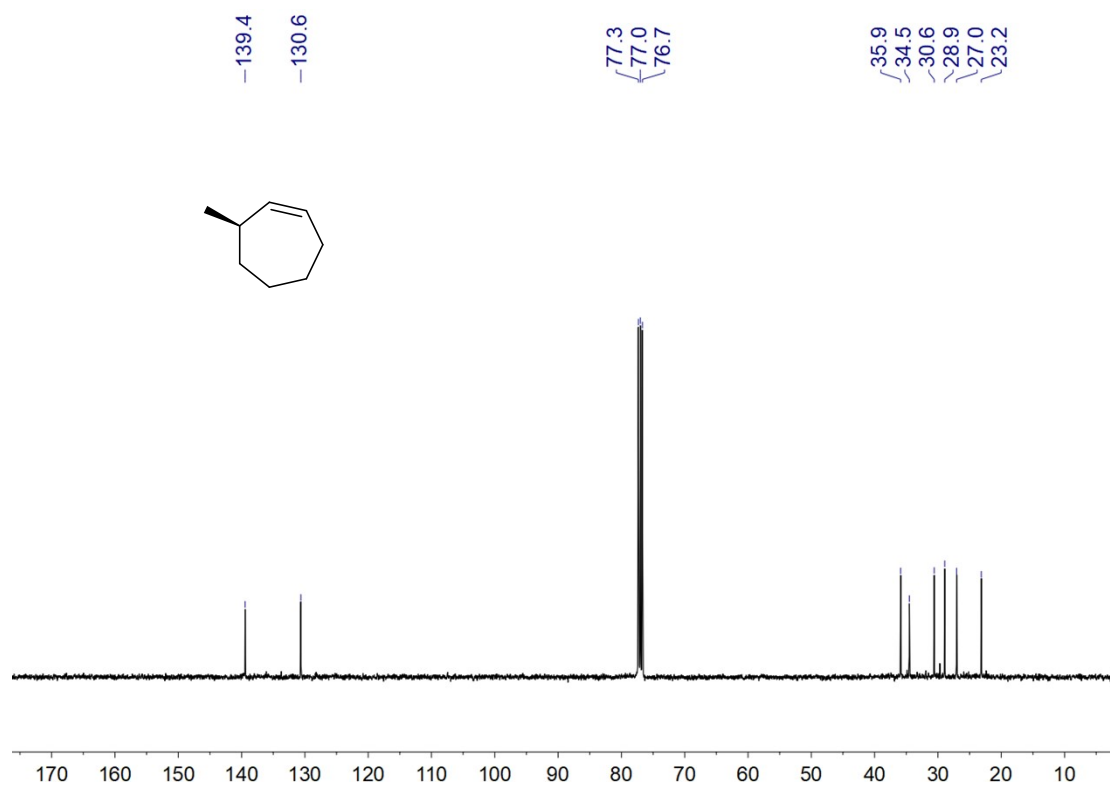

<sup>1</sup>H NMR spectrum of **5a** in CDCl<sub>3</sub>

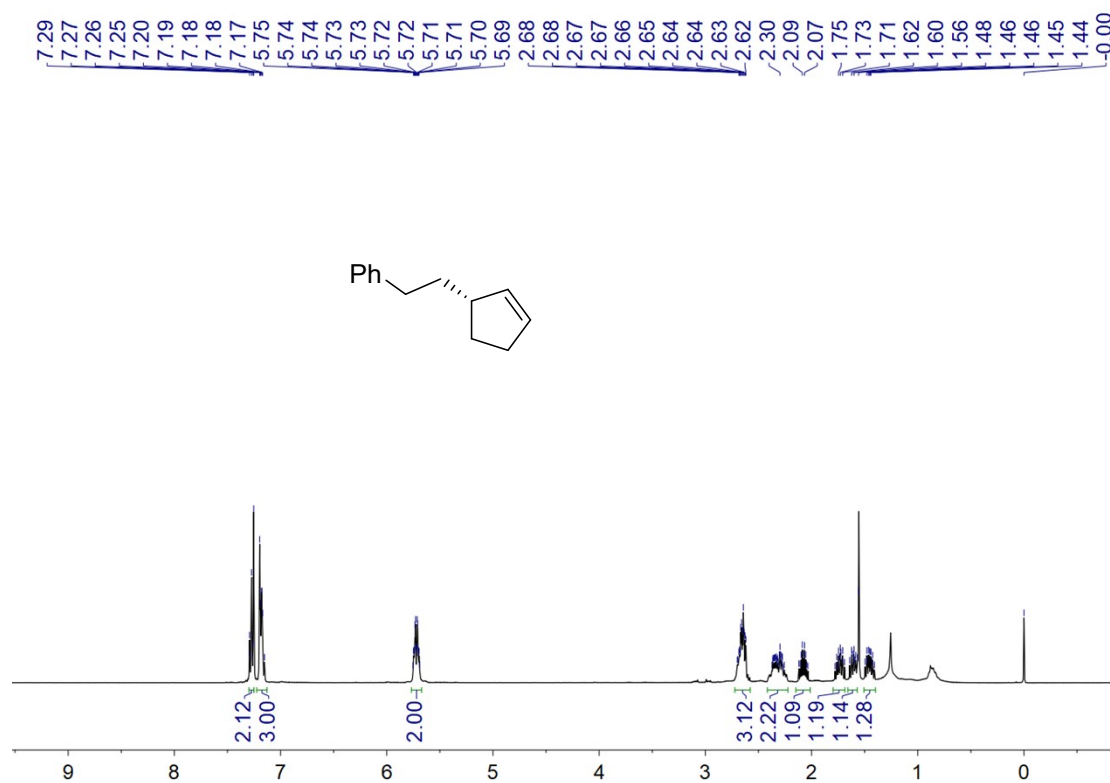

<sup>13</sup>C NMR spectrum of **5a** in CDCl<sub>3</sub>

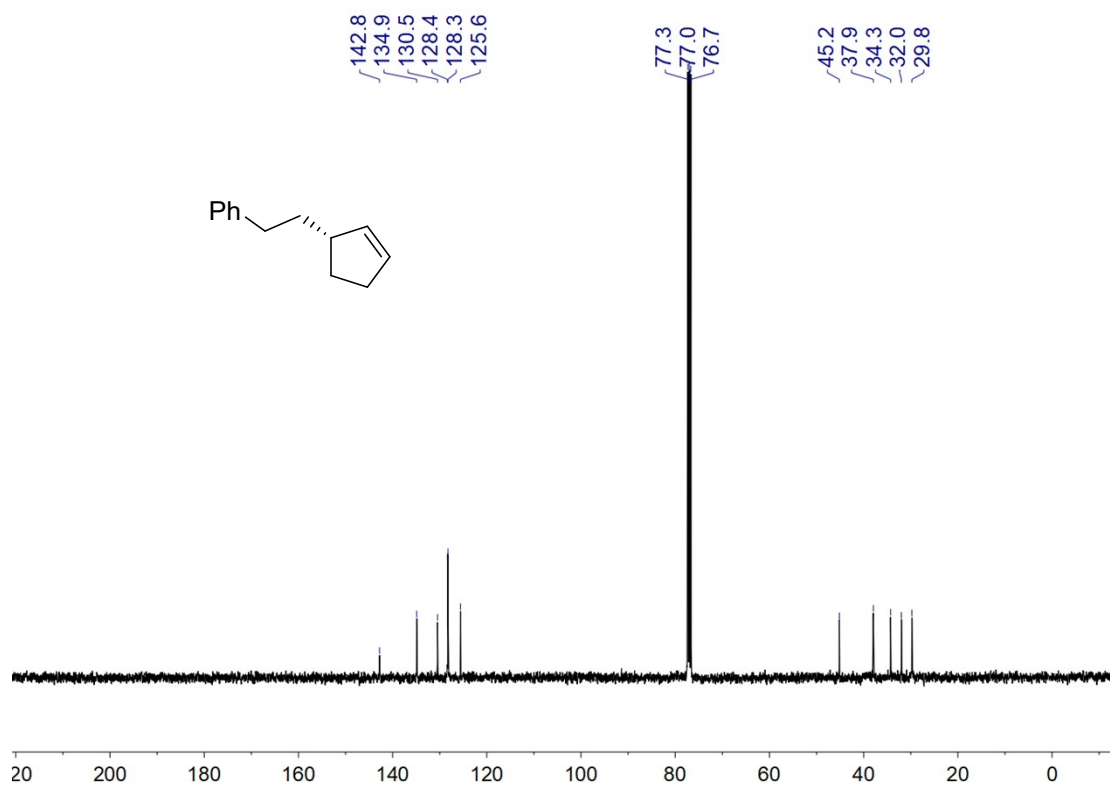

Supplement: d3sc00127j1.pdf [file d3sc00127j1.pdf]
